1 **Title:** The Northern Arizona SNP Pipeline (NASP): accurate, flexible, and rapid  
2 identification of SNPs in WGS datasets

3

4 Jason W. Sahl<sup>1,2\*</sup>, Darrin Lemmer<sup>2\*</sup>, Jason Travis<sup>2</sup>, James M. Schupp<sup>2</sup>, John D.  
5 Gillece<sup>2</sup>, Maliha Aziz<sup>2,3</sup>, Elizabeth M. Driebe<sup>2</sup>, Kevin Drees<sup>1,4</sup>, Nathan Hicks<sup>2</sup>,  
6 Charles H.D. Williamson<sup>1</sup>, Crystal Hepp<sup>1</sup>, David Smith<sup>2</sup>, Chandler Roe<sup>2</sup>, David M.  
7 Engelthaler<sup>2</sup>, David M. Wagner<sup>1</sup>, Paul Keim<sup>1,2</sup>

8

9 <sup>1</sup>Center for Microbial Genetics and Genomics, Northern Arizona University,  
10 Flagstaff, AZ; <sup>2</sup>Translational Genomics Research Institute, Flagstaff, AZ; <sup>3</sup>The  
11 George Washington University, Washington D.C.; <sup>4</sup>University of New Hampshire

12

13 \*Corresponding authors, Equal contribution to the manuscript

14

## 15 **Abstract**

16 Whole genome sequencing (WGS) of bacteria is becoming standard practice  
17 in many laboratories. Applications for WGS analysis include phylogeography and  
18 molecular epidemiology, using single nucleotide polymorphisms (SNPs) as the  
19 unit of evolution. The Northern Arizona SNP Pipeline (NASP) was developed as  
20 a reproducible pipeline that scales well with the large amount of WGS data  
21 typically used in comparative genomics applications. In this study, we  
22 demonstrate how NASP compares to other tools in the analysis of two real  
23 bacterial genomics datasets and one simulated dataset. Our results demonstrate  
24 that NASP produces comparable, and often better, results to other pipelines, but  
25 is much more flexible in terms of data input types, job management systems,  
26 diversity of supported tools, and output formats. We also demonstrate differences  
27 in results based on the choice of the reference genome and choice of inferring  
28 phylogenies from concatenated SNPs or alignments including monomorphic  
29 positions. NASP represents a source-available, version-controlled, unit-tested  
30 method and can be obtained from [tgennorth.github.io/NASP](https://tgennorth.github.io/NASP).

31

## 32 **Introduction**

33 Whole genome sequence (WGS) data from bacteria are rapidly increasing in  
34 public databases and have been used for outbreak investigations [1, 2],  
35 associating phylogeny with serology [3], as well as phylogeography [4]. WGS  
36 data are frequently used for variant identification, especially with regards to  
37 single nucleotide polymorphisms (SNPs). SNPs are used because they provide  
38 stable markers of evolutionary change between genomes [5]. Accurate and  
39 reliable SNP identification requires the implementation of methods to call, filter,  
40 and merge SNPs with tools that are version controlled, unit tested, and validated  
41 [6].

42 Multiple pipelines are currently available for the identification of SNPs from  
43 diverse WGS datasets, although the types of supported input files differ  
44 substantially. There are few pipelines that support the analysis of both raw  
45 sequence reads as well as genome assemblies. The ISG pipeline [7] calls SNPs  
46 from both raw reads, primarily from the Illumina platform, and genome  
47 assemblies, but wasn't optimized for job management systems and only exports  
48 polymorphic positions. While only polymorphic positions may be adequate for  
49 many studies, including monomorphic positions in the alignment has been shown  
50 to be important for various phylogenetic methods. A commonly used SNP  
51 analysis software method is kSNP, which has been discussed in three separate  
52 publications [8-10]. The most recent version of kSNP (v3) doesn't directly support  
53 the use of raw reads in the identification of SNPs. kSNP is a reference-  
54 independent approach in which all kmers of a defined length are compared to  
55 identify SNPs. The all-versus-all nature of the algorithm can result in a large RAM  
56 footprint and can stall on hundreds of bacterial genomes [7]. Finally, REALPHY  
57 was published as a method to identify SNPs using multiple references and then  
58 merging the results [11]. The authors claim that single reference based methods  
59 bias the results, especially from mapping raw reads against a divergent reference  
60 genome.

61 Additional methods have also been published that only support specific input  
62 formats. Parsnp is a method that can rapidly identify SNPs from the core

63 genome, but currently only processes closely related genome assemblies [12].  
64 SPANDx is a method that only supports raw reads, but does run on a variety of  
65 job management systems [13]. The program lyve-SET has been used in  
66 outbreak investigations and uses raw or simulated reads to identify SNPs [14].  
67 Finally, the CFSAN SNP-pipeline is a published pipeline from the United States  
68 Food and Drug Administration that only supports the use of raw reads [15]. There  
69 have been no published comparative studies to compare the functionality of  
70 these pipelines on a range of test datasets.

71 In this study, we describe the Northern Arizona SNP Pipeline (NASP). NASP  
72 is a source-available, unit-tested, version-controlled method to rapidly identify  
73 SNPs that works on a range of job management systems, incorporates multiple  
74 read aligners and SNP callers, works on both raw reads and genomes  
75 assemblies, calls both monomorphic and polymorphic positions, and has been  
76 validated on a range of diverse datasets. We compare NASP with other methods,  
77 both reference-dependent and reference-independent, in the analysis of three  
78 reference datasets.

79

## 80 **Methods**

81

82 NASP is implemented in Python and Go. NASP accepts multiple file formats as  
83 input, including “.fasta”, “.sam”, “.bam”, “.vcf”, “.fastq”, and “fastq.gz”. NASP can  
84 either function through a question/answer command line interface designed for  
85 ease of use, or through an argument-driven command-line interface. NASP was  
86 developed to work on job management systems including Torque, Slurm, and  
87 Sun/Oracle Grid Engine (SGE); a single node solution is available for NASP as  
88 well, but is not optimal. If filtering of duplicate regions in the reference genome is  
89 requested, the reference is aligned against itself with NUCmer [16]. These  
90 duplicated regions are then masked from downstream analyses, although are still  
91 available for investigation. If external genome assemblies are supplied, they are  
92 also aligned against the reference genome with NUCmer and SNPs are identified  
93 by a direct one-to-one mapping of the query to the reference. In the case of

94 duplications in the query but not the reference, all copies are aligned and any  
95 differences at any given base are masked with an “N” character to identify it as  
96 ambiguous.

97 If raw reads are supplied, they can be adapter and/or quality trimmed with  
98 Trimmomatic [17]. Raw or trimmed reads are aligned against a FASTA-formatted  
99 reference using one of the supported short read aligners, including BWA-MEM  
100 [18], Novoalign, bowtie2 [19] and SNAP [20]. A binary alignment map (BAM) file  
101 is created with Samtools [21] and SNPs can be called with multiple SNP callers,  
102 including the UnifiedGenotyper method in GATK [22, 23], Samtools, SolSNP  
103 (<http://sourceforge.net/projects/solsnp/>), and VarScan [24]. Positions that fail a  
104 user-defined depth and proportion threshold are filtered from downstream  
105 analyses but are retained in the “master” matrices. A workflow of the NASP  
106 pipeline is shown in Figure 1 and a summary is shown in Supplemental Table 1.

107 The results of the pipeline can include up to four separate SNP matrices. The  
108 first matrix is the master matrix (master.tsv), which includes all calls, both  
109 monomorphic and polymorphic, across all positions in the reference with no  
110 positions filtered or masked; positions that fall within duplicated regions are  
111 shown in this matrix, although they are flagged as duplicated. An optional second  
112 matrix (master\_masked.tsv) can also be produced. This matrix is the same as  
113 the master matrix, although any position that fails a given filter (minimum depth,  
114 minimum proportion) is masked with an “N”, whereas calls that could not be  
115 made are given an “X”; this matrix could be useful for applications where all high-  
116 quality, un-ambiguous positions should be considered. The third matrix  
117 (missingdata.tsv) includes only positions that are polymorphic across the sample  
118 set, but can include positions that are missing in a subset of genomes and not  
119 found in duplicated regions; these SNPs have also been processed with the  
120 minimum depth and proportion filters and are still high quality calls. The last  
121 matrix (bestsnp.tsv) is a matrix with only polymorphic, non-duplicated, clean calls  
122 (A,T,C,G) that pass all filters across all genomes. FASTA files are automatically  
123 produced that correspond to the bestsnp and missingdata matrices.

124 In addition to the matrices and FASTA files, NASP produces statistics that  
125 can be useful for the identification of potentially problematic genomes, such as  
126 low coverage or mixtures of multiple strains. These statistics can also be used for  
127 determining the size of the core genome, including both monomorphic and  
128 polymorphic positions, of a given set of genomes.

129 Post matrix scripts are included with NASP in order to convert between file  
130 formats, remove genomes and/or SNPs, provide functional SNP information, and  
131 to convert into formats that can be directly accepted by other tools, such as Plink  
132 [25], a method to conduct genome wide association studies (GWAS).  
133 Documentation for all scripts is included in the software repository.

134

135 **Test datasets.** To demonstrate the speed and functionality of the NASP pipeline,  
136 three datasets were selected. The first includes a set of 21 *Escherichia coli*  
137 genome assemblies used in other comparative studies [11, 26] (Supplemental  
138 Table 2). REALPHY was run on self-generated single-ended simulated reads,  
139 100bp in length. Additional pipelines were run with paired-end reads generated  
140 by ART chocolate cherry cake [27], using the following parameters: -l 100 -f 20 -p  
141 -ss HS25 -m 300 -s 50. Unless otherwise noted, the reference genome for SNP  
142 comparisons was K-12 MG1655 (NC\_000913) [28]. All computations were  
143 performed on a single node, 16-core server with 48Gb of available RAM. For  
144 kSNP, the optimum k value was selected by the KChooser script included with  
145 the repository.

146 The second dataset includes a set of 15 *Yersinia pestis* genomes from North  
147 America (Supplemental Table 3). For those external SNP pipelines that only  
148 support raw reads, simulated reads were generated from genome assemblies  
149 with ART. A set of SNPs (Supplemental Table 4) has previously been  
150 characterized on these genomes with wet-bench methods (unpublished). This set  
151 was chosen to determine how many verified SNPs could be identified by different  
152 SNP pipelines. All computations were performed on a single node, 16-core  
153 server with 48Gb of available RAM.

154 The last dataset includes simulated data from *Yersinia pestis*. Reads and  
155 assemblies from 133 *Y. pestis* genomes [29] were downloaded from public  
156 databases and processed with NASP using the CO92 genome as the reference  
157 to produce a reference phylogeny for WGS data simulation. Assemblies and  
158 reads were simulated from this reference phylogeny and a reference genome  
159 (CO92 chromosome) using TreeToReads  
160 (<https://github.com/snacktavish/TreeToReads>), introducing 3501 mutations. A  
161 phylogeny was inferred from the concatenated SNP alignment (3501 simulated  
162 SNPs produced by TreeToReads) with RAxML v8 to provide a ‘true’ phylogeny  
163 for the simulated data. Simulated reads (250bp) and assemblies were both  
164 processed with pipelines to identify how many of these introduced SNPs could be  
165 identified.

166 To test the scalability of NASP on genome assemblies, a set of 3520 *E. coli*  
167 genomes was selected (Supplemental Table 5). Genomes were randomly  
168 selected with a python script  
169 (<https://gist.github.com/jasonsahl/990d2c56c23bb5c2909d>) at various levels  
170 (100-1000) and processed with NASP. In this case, NASP was run on multiple  
171 nodes across a 31-node cluster at Northern Arizona University. The elapsed time  
172 was reported only for the step where aligned files are compiled into the resulting  
173 matrix. Time required for the other processes is dependent on the input file type  
174 and the amount of available resources on a HPC cluster.

175

176 **External SNP pipelines.** Multiple SNP pipelines, both reference-dependent and  
177 reference-independent, were compared with NASP, including kSNP v3.9.1 [10],  
178 ISG v0.16.10-3 [7], Parsnp v1.2 [12], REALPHY v112 [11], SPANDx v2.7 [13],  
179 Mugsy v1r2.2 [30], lyve-SET v1.1.6 [31], and CFSAN ([https://github.com/CFSAN-](https://github.com/CFSAN-Biostatistics/snp-pipeline)  
180 [Biostatistics/snp-pipeline](https://github.com/CFSAN-Biostatistics/snp-pipeline)). Exact commands used to run each method are shown  
181 in Supplemental Data File 1. An overview of all tested methods is shown in Table  
182 1. Most of the methods output FASTA files, which were used to infer  
183 phylogenies. For Mugsy, the MAF file was converted to FASTA with methods  
184 described previously [32].

185

186 **Phylogenetics.** Phylogenies were inferred using a maximum likelihood algorithm  
187 implemented in RAxML v8.1.7 [33], except where noted. The exact commands  
188 used to infer the phylogenies are shown in Supplemental Data File 1. Tree  
189 topologies were also compared on the same input data. Commands to infer  
190 these phylogenies using FastTree2 [34], ExaBayes [35], and Parsimonator  
191 ([github.com/stamatak/Parsimonator-1.0.2](https://github.com/stamatak/Parsimonator-1.0.2)) are shown in Supplemental Data File  
192 1.

193

194 **Dendrogram of multiple methods.** To visually represent how well different  
195 methods relate, a dendrogram was generated. Each phylogeny was compared  
196 against a maximum likelihood phylogeny inferred from the reference test set with  
197 `compare2trees`. A UPGMA dendrogram was then calculated with Phylip [36] on  
198 the resulting similarity matrix.

199

## 200 **Results**

201

202 **Pipeline functionality and post-matrix scripts.** NASP is a reference-  
203 dependent pipeline that can incorporate both raw reads and assemblies in the  
204 SNP discovery process; NASP was not developed for the identification and  
205 annotation of short insertions/deletions (indels). NASP can use multiple aligners  
206 and SNP callers to identify SNPs and the consensus calls can be calculated  
207 across all methods. An additional strength of NASP is that it can run on multiple  
208 job management systems as well as on a single node. A complete workflow of  
209 the NASP method is shown in Figure 1. Several post-matrix scripts are included  
210 with NASP in order to convert between file formats, including generating input  
211 files for downstream pipelines, including Plink [25]. An additional script can  
212 annotate a NASP SNP matrix using SnpEff [37] to provide functional information  
213 for each SNP.

214

215 **NASP run time scalability.** To visualize how NASP scales on processing  
216 genome assemblies, a set of 3520 *E. coli* genomes was sampled at 100 genome  
217 intervals and processed with NASP with 10 replicates. The results demonstrate  
218 that the matrix building step in NASP scales linearly with the processing of  
219 additional genomes (Figure 2A). The memory footprint of this step also scales  
220 linearly (Figure 2B) and doesn't exceed 4Gb on a large set of genomes (n=1000).  
221 If raw reads are used, additional time is required for the alignment and SNP  
222 calling methods, and the overall wall time would scale with the number of reads  
223 that needed to be processed. The matrix-building step, where assemblies and  
224 VCF files are merged into the matrix, would scale linearly regardless of the SNP  
225 identification method chosen.

226

227 **Pipeline comparisons on *E. coli* genomes data set.** To test differences  
228 between multiple pipelines, a set of 21 *E. coli* genomes used in other  
229 comparative genomics studies [11, 26] were downloaded and processed with  
230 Parsnp, SPANDx, kSNPv3, ISG, REALPHY, CFSAN, Iyve-SET, Mugsy, and  
231 NASP. For methods that do not support genome assemblies, paired end reads  
232 were simulated with ART, while single end reads were used by REALPHY, as  
233 this method is integrated into the pipeline.

234 To identify how well the simulated paired end reads represent the finished  
235 genomes, a NASP run was conducted on a combination of completed genome  
236 assemblies as well as simulated raw reads. The phylogeny demonstrates that  
237 assemblies and raw reads fall into identical locations (Supplemental Figure 1),  
238 suggesting that the paired end reads are representative of the finished genome  
239 assemblies.

240 The authors of REALPHY assert that their analysis of this dataset  
241 demonstrates the utility of using their approach to avoid biases in the use of a  
242 single reference genome by using multiple references [11]. However, in our tests,  
243 we could only get REALPHY to complete when using a single reference. To test  
244 differences between methods, SNPs were identified with multiple reference-  
245 dependent and -independent methods, and maximum likelihood (ML)



246 phylogenies were compared. The results demonstrate that all methods, with the  
247 exception of kSNPv3 and Iyve-SET, returned a phylogeny with the same  
248 topology as the published phylogeny [11] (compare2trees topological score =  
249 100%) (Table 2). The run wall time demonstrates that most other methods were  
250 significantly faster than REALPHY (Table 2), even when REALPHY was called  
251 against a single reference. Wall time comparisons between methods are  
252 somewhat problematic, as some pipelines infer phylogenies and others, including  
253 NASP, do not. Additionally, using raw reads is generally expected to be slower  
254 than using a draft or finished genome assembly. Finally, some methods are  
255 optimized for job management systems, whereas others were designed to run on  
256 a single node. For these comparisons, all methods that have single node support  
257 were run on a single node. Only SPANDx seems to be dependent on job  
258 management systems and could not be successfully run on a single node.

259 One of the other assertions of the REALPHY authors is that phylogenies  
260 reconstructed using an alignment of concatenated SNPs are unreliable [11, 26],  
261 especially with regards to branch length biases [38]. However, the phylogeny  
262 inferred from a NASP alignment of monomorphic and polymorphic sites was in  
263 complete agreement with the topology of the phylogeny inferred from a  
264 concatenation of only SNPs (compare2trees topological score = 100%); tree  
265 lengths were indeed variable by using these two different input types using the  
266 same substitution model (Supplemental Figure 2). We also employed an  
267 ascertainment bias correction (Lewis correction) implemented in RaxML [38], in  
268 order to correct for the use of only polymorphic sites, and found no difference  
269 between tree topologies using substitution models that did not employ this  
270 correction (data not shown). For this dataset of genomic *E. coli* assemblies, there  
271 appears to be no effect of using a concatenation of polymorphic sites on the  
272 resulting tree topology, although branch lengths were affected compared to an  
273 alignment containing monomorphic sites.

274 To understand how the choice of the reference affects the analysis, NASP  
275 was also run using *E. coli* genome assemblies and simulated reads against the  
276 outgroup, *E. fergusonii*, as the reference. The results demonstrate that the same

277 tree topology was obtained by using a different, and much more divergent,  
278 reference (compare2trees topology score = 100%). However, in both cases,  
279 fewer SNPs were identified by using a divergent reference (Table 2).

280 Some authors suggest that reference-independent approaches are less  
281 biased and more reliable than reference dependent-approaches [8]. For the case  
282 of this *E. coli* dataset, the phylogeny inferred by Mugsy, a reference-independent  
283 approach, was in topological agreement with other reference-dependent  
284 approaches (Table 2). In fact, kSNPv3 was one of the only methods that returned  
285 a tree phylogeny that was inconsistent with all other methods (Table 2); an  
286 inconsistent kSNP phylogeny has also been reported in the analysis of other  
287 datasets [15]. To analyze this further, we identified SNPs (n=826) from the NASP  
288 run using simulated paired-end reads that were uniquely shared on a branch of  
289 the phylogeny that defines a monophyletic lineage (Supplemental Figure 3). We  
290 then calculated how many of these SNPs were identified by all methods and  
291 found widely variable results (Table 2). Using kSNP with only core genome SNPs  
292 identified only 5 of these SNPs, which explains the differences in tree topologies.

293 In many cases, the same tree topology was returned even though the number  
294 of identified SNPs differed dramatically (Table 2). This result could be due to  
295 multiple factors, including if and how duplicates are filtered from the reference  
296 genome or other genome assemblies. With regards to NASP, erroneous SNPs  
297 called in genome assemblies are likely artifacts from the whole genome  
298 alignments using NUCmer. The default value for aligning through poorly scoring  
299 regions before breaking an alignment in NUCmer is 200, potentially introducing  
300 many spurious SNPs into the alignment, especially in misassembled regions in  
301 draft genome assemblies. By changing this value to 20, the same tree topology  
302 was obtained, although many fewer SNPs (n=~100,000) were identified (Table  
303 2). This value is easily altered in NASP and should be tuned based on the  
304 inherent expected diversity in the chosen dataset. Additional investigation is  
305 required to verify that SNPs in divergent regions are not being lost by changing  
306 this parameter. Another option is to use simulated reads from the genome  
307 assemblies in the SNP identification process.

308

309 **Phylogeny differences on the same dataset.** Previously, it has been  
310 demonstrated that different phylogenies can be obtained on the same dataset  
311 using either RAxML or FastTree2 [15]. To test this result across multiple  
312 phylogenetic inference methods, the NASP *E. coli* read dataset was used.  
313 Phylogenies were then inferred using a maximum likelihood method in RAxML, a  
314 maximum parsimony method implemented in Parsimonator, a minimum evolution  
315 method in FastTree2, and a Bayesian method implemented in Exabayes [35].  
316 The results demonstrate variability in the placement of one genome (UMN026)  
317 depending on the method. FastTree2 and Exabayes agreed on their topologies,  
318 including 100% congruence of the replicate trees. The maximum likelihood and  
319 maximum parsimony phylogenies were slightly different (Supplemental Figure 3)  
320 and included low bootstrap replicate values at the variable node. The correct  
321 placement of UMN026 is unknown and is likely confounded by the extensive  
322 recombination observed in *E. coli* [39].

323

324 **Pipeline comparisons on a well characterized dataset.** To test the  
325 functionality of different SNP calling pipelines, a set of 15 finished *Yersinia pestis*  
326 genomes were compared. This set of genomes was selected because 26 SNPs  
327 in the dataset have been verified by wet-bench methods (Supplemental Table 4).  
328 Additionally, 13 known errors in the reference genome, *Y. pestis* CO92 [40], have  
329 been identified (Supplemental Table 4) and should consistently be identified in  
330 SNP discovery methods. The small number of SNPs in the dataset requires  
331 accurate SNP identification to resolve the phylogenetic relationships of these  
332 genomes.

333 The results demonstrate differences in the total number of SNPs called  
334 between different methods (Table 3). Most of the methods identified all 13 known  
335 sequencing errors in CO92, although Parsnp, REALPHY, and kSNPv3 failed to  
336 do so. The number of verified SNPs also varied between methods, from 21 in  
337 kSNPv3 to all 26 in multiple methods (Table 3). An analysis of wet-bench  
338 validated SNPs (n=9) that are identified in more than one genome demonstrated

339 that some methods failed to identify all of these SNPs, which could lead to a very  
340 different phylogeny than the phylogeny using these SNPs that are vital for  
341 resolving important phylogenetic relationships. These SNPs could represent  
342 differences that could differentiate between strains in an outbreak event.

343

#### 344 **Pipeline comparisons on a simulated set of assemblies and reads.**

345 Simulated data for *Y. pestis* were used to compare SNP identification between  
346 pipelines. In this method, 3501 mutations (Supplemental Data File 2) were  
347 inserted into genomes based on a published phylogeny [41] and FASTA file. Raw  
348 reads were also simulated from these artificially mutated assemblies with ART to  
349 generate paired end sequences. Reads and assemblies were run across all  
350 pipelines, where applicable.

351 The results demonstrate that NASP identified all of the inserted SNPs using  
352 raw reads, although 68 SNPs failed the proportion filter (0.90) and 232 SNPs fell  
353 in duplicated regions (Table 4); some of the duplicated SNPs would also fail the  
354 proportion filter. Of all other methods, only ISG identified all inserted mutations.  
355 SPANDx only identified 2248 SNPs when run with default values. Parsnp  
356 identified the majority of the mutations, although duplicate regions appear to  
357 have also been aligned.

358 To understand how the SNPs called would affect the overall tree topology, a  
359 phylogeny was inferred for each set of SNPs with RAxML. A similarity matrix was  
360 made for each method based on the topological score compared to the ML  
361 phylogeny inferred from the known mutations. The UPGMA dendrogram  
362 demonstrates that the NASP results return a phylogeny that is more  
363 representative of the “true” phylogeny than other methods (Figure 3). Without  
364 removing SNPs found in duplicated regions, the NASP phylogeny was identical  
365 to the phylogeny inferred from the known SNPs.

366

367

368

369

## 370 **Discussion**

371 Understanding relationships between bacterial isolates in a population is  
372 important for applications such as source tracking, outbreak investigations,  
373 phylogeography, population dynamics, and diagnostic development. With the  
374 large numbers of genomes that are typically associated with these investigations,  
375 methods are required to quickly and accurately identify SNPs in a reference  
376 population. However, no studies have conducted a broad analysis to compare  
377 published methods on real and simulated datasets to identify relevant strengths  
378 and weaknesses.

379 Multiple publications have used a reference-dependent approach to identify  
380 SNPs to understand population dynamics [38]. While the specific methods are  
381 often published, the pipelines to run these processes are often un-published [42,  
382 43], which complicates the ability to replicate results. NASP has already been  
383 used to identify SNPs from multiple organisms, including fungal [44] and bacterial  
384 [45, 46] pathogens. The version-controlled source code is available for NASP,  
385 which should ensure the replication of results across research groups.

386 Recently it has been suggested that the use of a single reference can bias the  
387 identification of SNPs, especially in divergent references [11]. In our *E. coli* test  
388 set, ~29,000 fewer SNPs were called by aligning *E. coli* reads against the  
389 reference genome of the outgroup, *E. fergusonii*, compared to the K-12  
390 reference, although the tree topologies were identical (Table 2). In the *E. coli* test  
391 set phylogeny, the major clades are delineated by enough SNPs that the loss of  
392 a small percentage is insufficient to change the overall tree topology, although  
393 the branch lengths were variable. In other datasets, the choice of the reference  
394 should be made carefully to include as many SNPs as needed to define the  
395 population structure of a given dataset.

396 According to the authors of kSNP, a k-mer-based reference-independent  
397 approach, there are times where alignments are not appropriate in understanding  
398 bacterial population structure [8]. In our *E. coli* analysis, reference-dependent  
399 and reference-independent methods generally returned the same tree topology  
400 (Table 2), with the exception of kSNPv3 and lyve-SET, using only core genome

401 SNPs. Using all of the SNPs identified by kSNPv3 also gave a different tree  
402 topology than the other methods (Table 2). A detailed look at branch specific  
403 SNPs demonstrated that using kSNP with core SNPs failed to identify most of the  
404 branch specific SNPs for one of the major defining clades (Table 2). For datasets  
405 that are only defined by a small number of SNPs, a method should be chosen  
406 that includes as many SNPs as possible in order to maximize the relevant search  
407 space. While NASP cannot truly use the pan-genome if a single reference  
408 genome is chosen, it can incorporate data from all positions in the reference  
409 genome if missing data are included in the alignment. A true pan-genome  
410 reference can be used with NASP to more comprehensively identify SNPs, but  
411 curation of the pan-genome is necessary to remove genomic elements  
412 introduced by horizontal gene transfer that could potentially confound the  
413 phylogeny.

414 Phylogenetics on an alignment of concatenated SNPs is thought to be less  
415 preferable than an alignment that also contains monomorphic positions [11, 38].  
416 However, the inclusion of monomorphic positions can drastically increase the run  
417 time needed to infer a phylogeny, especially where the population structure of a  
418 species can be determined by a small number of polymorphisms. Substitution  
419 models are available in RAxML v8 that contain acquisition bias corrections that  
420 should be considered when inferring phylogenies from concatenated SNP  
421 alignments. In our *E. coli* test case, using concatenated SNPs did not change the  
422 tree topology compared to a phylogeny inferred from all sites, but did affect  
423 branch lengths (Supplemental Figure 2). For downstream methods that depend  
424 on accurate branch lengths, decisions must be made on whether or not to  
425 include monomorphic positions into the alignment. NASP provides the user with  
426 the flexibility to make those decisions in a reproducible manner.

427 NASP represents a version-controlled, unit-tested pipeline for identifying  
428 SNPs from datasets with diverse input types. NASP is a high throughput method  
429 that can take a range of input formats, can accommodate multiple job  
430 management systems, can use multiple read aligners and SNP callers, can

431 identify both monomorphic and polymorphic sites, and can generate core  
432 genome statistics across a population.

433

#### 434 **Figure Legends**

435 **Figure 1.** A workflow of the NASP algorithm. Optional steps are shown by  
436 dashed lines.

437

438 **Figure 2.** NASP benchmark comparisons of runtime (A) and RAM (B) on a set of  
439 *Escherichia coli* genomes. For the runtime comparisons, 3520 *E. coli* genomes  
440 were randomly sampled ten times at different depths and run on a server with  
441 856 cores. Only the matrix building step is shown, but demonstrates a linear  
442 scaling with the processing of additional genomes.

443

444 **Figure 3.** Dendrogram of tree building methods on a simulated set of mutations  
445 in the genome of *Yersinia pestis* Colorado 92. The topological score was  
446 generated by compare2trees compared to a maximum likelihood phylogeny  
447 inferred from a set of 3501 SNPs inserted by Tree2Reads. The dendrogram was  
448 generated with the Neighbor method in the Phylip software package [36].

449

#### 450 **References**

- 451 1. Rasko DA, Webster DR, Sahl JW, Bashir A, Boisen N, Scheutz F, Paxinos EE,  
452 Sebra R, Chen-Shan C, Iliopoulos D, et al: **Origins of the E.coli strain causing  
453 an outbreak of hemolytic-uremic syndrome in Germany.** *N Engl J Med*  
454 2011.
- 455 2. Eppinger M, Mammel MK, Leclerc JE, Ravel J, Cebula TA: **Genomic anatomy  
456 of Escherichia coli O157:H7 outbreaks.** *Proc Natl Acad Sci U S A* 2011,  
457 **108**:20142-20147.
- 458 3. Sahl JW, Morris CR, Emberger J, Fraser CM, Ochieng JB, Juma J, Fields B,  
459 Breiman RF, Gilmour M, Nataro JP, Rasko DA: **Defining the phylogenomics  
460 of Shigella species: a pathway to diagnostics.** *J Clin Microbiol* 2015,  
461 **53**:951-960.
- 462 4. Keim PS, Wagner DM: **Humans and evolutionary and ecological forces  
463 shaped the phylogeography of recently emerged diseases.** *Nat Rev*  
464 *Microbiol* 2009, **7**:813-821.
- 465 5. Foster JT, Beckstrom-Sternberg SM, Pearson T, Beckstrom-Sternberg JS,  
466 Chain PS, Roberto FF, Hnath J, Brettin T, Keim P: **Whole-genome-based**

- 467 **phylogeny and divergence of the genus *Brucella*. *J Bacteriol* 2009,**  
468 **191:2864-2870.**
- 469 6. Olson ND, Lund SP, Colman RE, Foster JT, Sahl JW, Schupp JM, Keim P,  
470 Morrow JB, Salit ML, Zook JM: **Best practices for evaluating single**  
471 **nucleotide variant calling methods for microbial genomics. *Front Genet***  
472 **2015, 6:235.**
- 473 7. Sahl JW, Beckstrom-Sternberg SM, Babic-Sternberg J, Gillece JD, Hepp CM,  
474 Auerbach RK, Tembe W, Wagner DM, Keim PS, Pearson T: **The In Silico**  
475 **Genotyper (ISG): an open-source pipeline to rapidly identify and**  
476 **annotate nucleotide variants for comparative genomics applications.**  
477 ***bioRxiv* 2015, 015578.**
- 478 8. Gardner SN, Hall BG: **When whole-genome alignments just won't work:**  
479 **kSNP v2 software for alignment-free SNP discovery and phylogenetics**  
480 **of hundreds of microbial genomes. *PLoS ONE* 2013,**  
481 **10.1371/journal.pone.0081760.**
- 482 9. Gardner SN, Slezak T: **Scalable SNP analyses of 100 bacterial or viral**  
483 **genomes. *J Forensic Res* 2010, 1:doi:10.4172/2157-7145.1000107.**
- 484 10. Gardner SN, Slezak T, Hall BG: **kSNP3.0: SNP detection and phylogenetic**  
485 **analysis of genomes without genome alignment or reference genome.**  
486 ***Bioinformatics* 2015, 31:2877-2878.**
- 487 11. Bertels F, Silander OK, Pachkov M, Rainey PB, van Nimwegen E: **Automated**  
488 **reconstruction of whole-genome phylogenies from short-sequence**  
489 **reads. *Mol Biol Evol* 2014, 31:1077-1088.**
- 490 12. Treangen TJ, Ondov BD, Koren S, Phillippy AM: **The Harvest suite for rapid**  
491 **core-genome alignment and visualization of thousands of intraspecific**  
492 **microbial genomes. *Genome Biol* 2014, 15:524.**
- 493 13. Sarovich DS, Price EP: **SPANDx: a genomics pipeline for comparative**  
494 **analysis of large haploid whole genome re-sequencing datasets. *BMC Res***  
495 **Notes 2014, 7:618.**
- 496 14. **Future directions for research on enterotoxigenic *Escherichia coli***  
497 **vaccines for developing countries. *Wkly Epidemiol Rec* 2006, 81:97-104.**
- 498 15. Pettengill JB, Luo Y, Davis S, Chen Y, Gonzalez-Escalona N, Ottesen A, Rand H,  
499 Allard MW, Strain E: **An evaluation of alternative methods for**  
500 **constructing phylogenies from whole genome sequence data: a case**  
501 **study with *Salmonella*. *PeerJ* 2014, 2:e620.**
- 502 16. Delcher AL, Salzberg SL, Phillippy AM: **Using MUMmer to identify similar**  
503 **regions in large sequence sets. *Curr Protoc Bioinformatics* 2003, Chapter**  
504 **10:Unit 10 13.**
- 505 17. Bolger AM, Lohse M, Usadel B: **Trimmomatic: a flexible trimmer for**  
506 **Illumina sequence data. *Bioinformatics* 2014, 30:2114-2120.**
- 507 18. Li H: **Aligning sequence reads, clone sequences and assembly contigs**  
508 **with BWA-MEM. *arXiv.org* 2013.**
- 509 19. Langmead B, Salzberg SL: **Fast gapped-read alignment with Bowtie 2. *Nat***  
510 **Methods 2012, 9:357-359.**



- 511 20. Zaharia M, Bolosky WJ, Curtis K, Fox A, Patterson D, Shenker S, Stoica I, Karp  
512 RM, Sittler T: **Faster and More Accurate Sequence Alignment with SNAP.**  
513 *arXiv.org* 2011, **arXiv.1111.5572 [cs.DS]**.
- 514 21. Li H, Handsaker B, Wysoker A, Fennell T, Ruan J, Homer N, Marth G, Abecasis  
515 G, Durbin R, Genome Project Data Processing S: **The Sequence**  
516 **Alignment/Map format and SAMtools.** *Bioinformatics* 2009, **25**:2078-2079.
- 517 22. DePristo MA, Banks E, Poplin R, Garimella KV, Maguire JR, Hartl C, Philippakis  
518 AA, del Angel G, Rivas MA, Hanna M, et al: **A framework for variation**  
519 **discovery and genotyping using next-generation DNA sequencing data.**  
520 *Nature genetics* 2011, **43**:491-498.
- 521 23. McKenna A, Hanna M, Banks E, Sivachenko A, Cibulskis K, Kernysky A,  
522 Garimella K, Altshuler D, Gabriel S, Daly M, DePristo MA: **The Genome**  
523 **Analysis Toolkit: a MapReduce framework for analyzing next-**  
524 **generation DNA sequencing data.** *Genome research* 2010, **20**:1297-1303.
- 525 24. Koboldt DC, Zhang Q, Larson DE, Shen D, McLellan MD, Lin L, Miller CA,  
526 Mardis ER, Ding L, Wilson RK: **VarScan 2: somatic mutation and copy**  
527 **number alteration discovery in cancer by exome sequencing.** *Genome*  
528 *Res* 2012, **22**:568-576.
- 529 25. Renteria ME, Cortes A, Medland SE: **Using PLINK for Genome-Wide**  
530 **Association Studies (GWAS) and data analysis.** *Methods Mol Biol* 2013,  
531 **1019**:193-213.
- 532 26. Touchon M, Hoede C, Tenailon O, Barbe V, Baeriswyl S, Bidet P, Bingen E,  
533 Bonacorsi S, Bouchier C, Bouvet O, et al: **Organised genome dynamics in**  
534 **the Escherichia coli species results in highly diverse adaptive paths.**  
535 *PLoS Genet* 2009, **5**:e1000344.
- 536 27. Huang W, Li L, Myers JR, Marth GT: **ART: a next-generation sequencing**  
537 **read simulator.** *Bioinformatics* 2012, **28**:593-594.
- 538 28. Blattner FR, Plunkett G, 3rd, Bloch CA, Perna NT, Burland V, Riley M, Collado-  
539 Vides J, Glasner JD, Rode CK, Mayhew GF, et al: **The complete genome**  
540 **sequence of Escherichia coli K-12.** *Science* 1997, **277**:1453-1462.
- 541 29. Cui Y, Yu C, Yan Y, Li D, Li Y, Jombart T, Weinert LA, Wang Z, Guo Z, Xu L, et al:  
542 **Historical variations in mutation rate in an epidemic pathogen, Yersinia**  
543 **pestis.** *Proc Natl Acad Sci U S A* 2013, **110**:577-582.
- 544 30. Angiuoli SV, Salzberg SL: **Mugsy: Fast multiple alignment of closely**  
545 **related whole genomes.** *Bioinformatics* 2010.
- 546 31. Katz LS, Petkau A, Beaulaurier J, Tyler S, Antonova ES, Turnsek MA, Guo Y,  
547 Wang S, Paxinos EE, Orata F, et al: **Evolutionary dynamics of Vibrio**  
548 **cholerae O1 following a single-source introduction to Haiti.** *MBio* 2013,  
549 **4**.
- 550 32. Sahl JW, Steinsland H, Redman JC, Angiuoli SV, Nataro JP, Sommerfelt H,  
551 Rasko DA: **A comparative genomic analysis of diverse clonal types of**  
552 **enterotoxigenic Escherichia coli reveals pathovar-specific conservation.**  
553 *Infect Immun* 2011, **79**:950-960.
- 554 33. Stamatakis A: **RAxML version 8: a tool for phylogenetic analysis and**  
555 **post-analysis of large phylogenies.** *Bioinformatics* 2014.

- 556 34. Price MN, Dehal PS, Arkin AP: **FastTree 2--approximately maximum-**  
557 **likelihood trees for large alignments.** *PLoS One* 2010, **5**:e9490.
- 558 35. Aberer AJ, Kobert K, Stamatakis A: **ExaBayes: massively parallel bayesian**  
559 **tree inference for the whole-genome era.** *Mol Biol Evol* 2014, **31**:2553-  
560 2556.
- 561 36. Felsenstein J: **PHYLIP (Phylogeny Inference Package) version 3.6.** 3.6  
562 edition. University of Washington, Seattle: Department of Genome Sciences;  
563 2005.
- 564 37. Cingolani P, Platts A, Wang le L, Coon M, Nguyen T, Wang L, Land SJ, Lu X,  
565 Ruden DM: **A program for annotating and predicting the effects of single**  
566 **nucleotide polymorphisms, SnpEff: SNPs in the genome of Drosophila**  
567 **melanogaster strain w1118; iso-2; iso-3.** *Fly (Austin)* 2012, **6**:80-92.
- 568 38. Leache AD, Banbury BL, Felsenstein J, de Oca AN, Stamatakis A: **Short Tree,**  
569 **Long Tree, Right Tree, Wrong Tree: New Acquisition Bias Corrections**  
570 **for Inferring SNP Phylogenies.** *Syst Biol* 2015.
- 571 39. Dykhuizen DE, Green L: **Recombination in Escherichia coli and the**  
572 **definition of biological species.** *Journal of bacteriology* 1991, **173**:7257-  
573 7268.
- 574 40. Parkhill J, Wren BW, Thomson NR, Titball RW, Holden MT, Prentice MB,  
575 Sebahia M, James KD, Churcher C, Mungall KL, et al: **Genome sequence of**  
576 **Yersinia pestis, the causative agent of plague.** *Nature* 2001, **413**:523-527.
- 577 41. Nawrocki EP, Kolbe DL, Eddy SR: **Infernal 1.0: inference of RNA**  
578 **alignments.** *Bioinformatics* 2009, **25**:1335-1337.
- 579 42. den Bakker HC, Allard MW, Bopp D, Brown EW, Fontana J, Iqbal Z, Kinney A,  
580 Limberger R, Musser KA, Shudt M, et al: **Rapid whole-genome sequencing**  
581 **for surveillance of Salmonella enterica serovar enteritidis.** *Emerg Infect*  
582 *Dis* 2014, **20**:1306-1314.
- 583 43. Hsu LY, Harris SR, Chlebowicz MA, Lindsay JA, Koh TH, Krishnan P, Tan TY,  
584 Hon PY, Grubb WB, Bentley SD, et al: **Evolutionary dynamics of**  
585 **methicillin-resistant Staphylococcus aureus within a healthcare system.**  
586 *Genome Biol* 2015, **16**:81.
- 587 44. Engelthaler DM, Hicks ND, Gillece JD, Roe CC, Schupp JM, Driebe EM, Gilgado  
588 F, Carriconde F, Trilles L, Firacative C, et al: **Cryptococcus gattii in North**  
589 **American Pacific Northwest: whole-population genome analysis**  
590 **provides insights into species evolution and dispersal.** *MBio* 2014,  
591 **5**:e01464-01414.
- 592 45. Sahl JW, Schupp JM, Rasko DA, Colman RE, Foster JT, Keim P:  
593 **Phylogenetically typing bacterial strains from partial SNP genotypes**  
594 **observed from direct sequencing of clinical specimen metagenomic**  
595 **data.** *Genome Med* 2015, **7**:52.
- 596 46. Sahl JW, Sistrunk JR, Fraser CM, Hine E, Baby N, Begum Y, Luo Q, Sheikh A,  
597 Qadri F, Fleckenstein JM, Rasko DA: **Examination of the Enterotoxigenic**  
598 **Escherichia coli Population Structure during Human Infection.** *MBio*  
599 2015, **6**:e00501.
- 600

**Table 1.** An overview of commonly used SNP pipelines

| Pipeline name | Supported data types             | Output type                       | Parallel Job management support? |
|---------------|----------------------------------|-----------------------------------|----------------------------------|
| NASP          | FASTA,BAM,SAM,VCF,FASTQ,FASTQ.GZ | matrix, VCF, FASTA                | SGE,SLURM,TORQUE                 |
| ISG           | FASTA,BAM,VCF,FASTQ,FASTQ.GZ     | matrix, FASTA                     | No                               |
| Parsnp        | FASTA                            | gingr file, phylogeny, FASTA, VCF | No                               |
| REALPHY       | FASTA*, FASTQ, FASTQ.GZ          | multi-FASTA, phylogeny            | No                               |
| SPANDx        | FASTQ.GZ                         | Nexus file                        | SGE,SLURM,TORQUE                 |
| CFSAN         | FASTQ, FASTQ.GZ                  | SNP list, FASTA                   | SGE,TORQUE                       |
| kSNPv3        | FASTA                            | Matrix, FASTA, phylogeny          | No                               |
| Mugsy         | FASTA                            | MAF file                          | No                               |
| LYVE-set      | FASTQ.GZ, FASTA*                 | matrix, FASTA, phylogeny          | SGE                              |

601

\*generates simulated reads

**Table 2. SNP calling results on a set of 21 *E. coli* genomes**

| Method   | Reference                  | Data Type        | Parameters                        | #SNPs considered    | #Total sites | Walltime (single node - 8 cores) | Topological score | # defining SNPs |
|----------|----------------------------|------------------|-----------------------------------|---------------------|--------------|----------------------------------|-------------------|-----------------|
| NASP     | K12 MG1655                 | Assemblies       | Default                           | 267978 <sup>a</sup> | 2322434      | 10m00s                           | 100%              | 809             |
| NASP     | K12 MG1655                 | Assemblies       | NUCmer (-b 20)                    | 162758 <sup>a</sup> | 1839583      | 10m00s                           | 100%              | 744             |
| NASP     | K12 MG1655                 | ART PE reads     | BWA, GATK, MinDepth=3, MinAF=0.90 | 170208 <sup>a</sup> | 1984510      | 1h43m00s                         | 100%              | 826             |
| NASP     | <i>E. fergusonii</i> 35469 | Assemblies       | Default                           | 244262 <sup>a</sup> | 2227038      | 10m00s                           | 100%              | 741             |
| NASP     | <i>E. fergusonii</i> 35469 | ART PE reads     | BWA, GATK, MinDepth=3, MinAF=0.90 | 141238 <sup>a</sup> | 1813349      | 1h17m10s                         | 100%              | 748             |
| ISG      | K12 MG1655                 | Assemblies       | Default                           | 268524 <sup>a</sup> | N/A          | 6m47s                            | 100%              | 810             |
| ISG      | K12 MG1655                 | ART PE reads     | minaf 0.9, mindp 3                | 206193 <sup>a</sup> | N/A          | 14m45s                           | 100%              | 824             |
| Parsnp   | K12 MG1655                 | Assemblies       | "-c d"                            | 151256 <sup>a</sup> | 1682404      | 4m35s                            | 100%              | 777             |
| REALPHY  | K12 MG1655                 | REALPHY SE reads | Default                           | 171828 <sup>a</sup> | 1897146      | 3h11m00s                         | 100%              | 779             |
| kSNPv3   | N/A                        | Assemblies       | -core                             | 20587 <sup>a</sup>  | N/A          | 27m58s                           | 91.80%            | 5               |
| kSNPv3   | N/A                        | Assemblies       | Default                           | 284134              | N/A          | 27m58s                           | 95.80%            | 547             |
| Spandx   | K12 MG1655                 | ART PE reads     | Default                           | 95214 <sup>a</sup>  | N/A          | N/A                              | 100%              | 709             |
| CFSAN    | K12 MG1655                 | ART PE reads     | Default                           | 128512 <sup>a</sup> | N/A          | 1h56m00s                         | 100%              | 808             |
| Mugsy    | N/A                        | Assemblies       | Default                           | 307072 <sup>a</sup> | 2478794      | 1h39m03s                         | 100%              | unknown         |
| lyve-SET | K12 MG1655                 | ART PE reads     | min_coverate 3, min_alt_frac 0.9  | 163118 <sup>a</sup> | 1183153      | 6h25m                            | 85%               | 329             |

<sup>a</sup>strictly core genome SNPs

602

603

604

605

606

607

608

609

610

611

612

613

**Table 3. SNP calling results on a set of *Y. pestis* genomes**

| Method   | Data type               | Parameters                        | #called SNPs | #CO92 errors (n=13) | #verified SNPs (n=26) | Vital SNF (n=9) |
|----------|-------------------------|-----------------------------------|--------------|---------------------|-----------------------|-----------------|
| NASP     | ART simulated reads     | BWA, GATK, MinDepth=3, MinAF=0.90 | 147          | 13                  | 26                    | 9               |
| NASP     | assemblies              | default                           | 181          | 13                  | 26                    | 9               |
| ISG      | ART simulated reads     | minaf=3, mindp = 0.9              | 151          | 13                  | 26                    | 9               |
| ISG      | assemblies              | default                           | 177          | 13                  | 26                    | 9               |
| Parsnp   | assemblies              | default                           | 141          | 12                  | 23                    | 7               |
| REALPHY  | REALPHY simulated reads | default                           | 163          | 12                  | 25                    | 9               |
| SPANDx   | ART simulated reads     | default                           | 150          | 13                  | 25                    | 9               |
| kSNPv3   | assemblies              | k=19                              | 130          | 11                  | 21                    | 5               |
| CFSAN    | ART simulated reads     | default                           | 250          | 13                  | 26                    | 9               |
| lyve-SET | ART simulated reads     | min_coverage 3, min_alt_frac 0.9  | 402          | 13                  | 26                    | 9               |

614

615

616

**Table 4.** Simulated data results

| Method   | Data type            | #called SNPs | SNPs in duplicated regions | Filtered SNPs | Total SNPs | Topologica score |
|----------|----------------------|--------------|----------------------------|---------------|------------|------------------|
| NASP     | simulated reads      | 3202         | 232                        | 67            | 3501       | 98.50%           |
| NASP     | simulated assemblies | 3269         | 232                        | N/A           | 3501       | 98.50%           |
| Parsnp   | simulated assemblies | 3492         | unknown                    | N/A           | 3492       | 95.60%           |
| ISG      | simulated reads      | 3258         | 126                        | 8             | 3392       | 92.40%           |
| ISG      | simulated assemblies | 3266         | 235                        | N/A           | 3501       | 95.60%           |
| SPANDx   | simulated reads      | 2132         | unknown                    | 116           | 2248       | 87.20%           |
| CFSAN    | simulated reads      | 3290         | unknown                    | unknown       | 3290       | 95.30%           |
| REALPHY  | simulated assemblies | 3320         | unknown                    | unknown       | 3320       | 91.60%           |
| kSNPv3   | simulated assemblies | 3304         | unknown                    | N/A           | 3304       | 91.90%           |
| lyve-SET | simulated reads      | 3460         | unknown                    | unknown       | 3460       | 95.80%           |

617  
618  
619  
620  
621  
622  
623  
624  
625  
626  
627  
628  
629

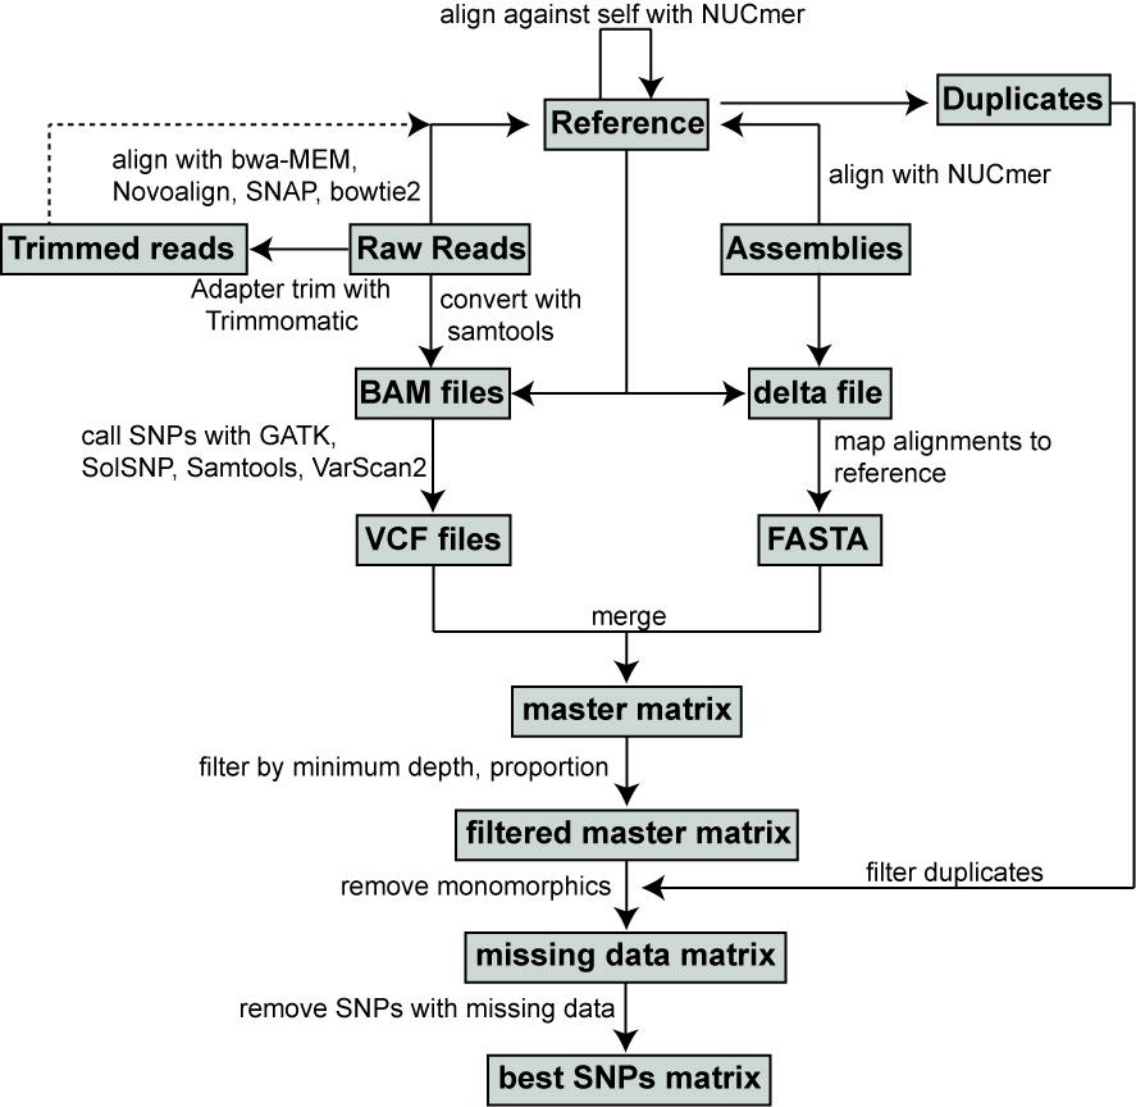

**A.****Elapsed time**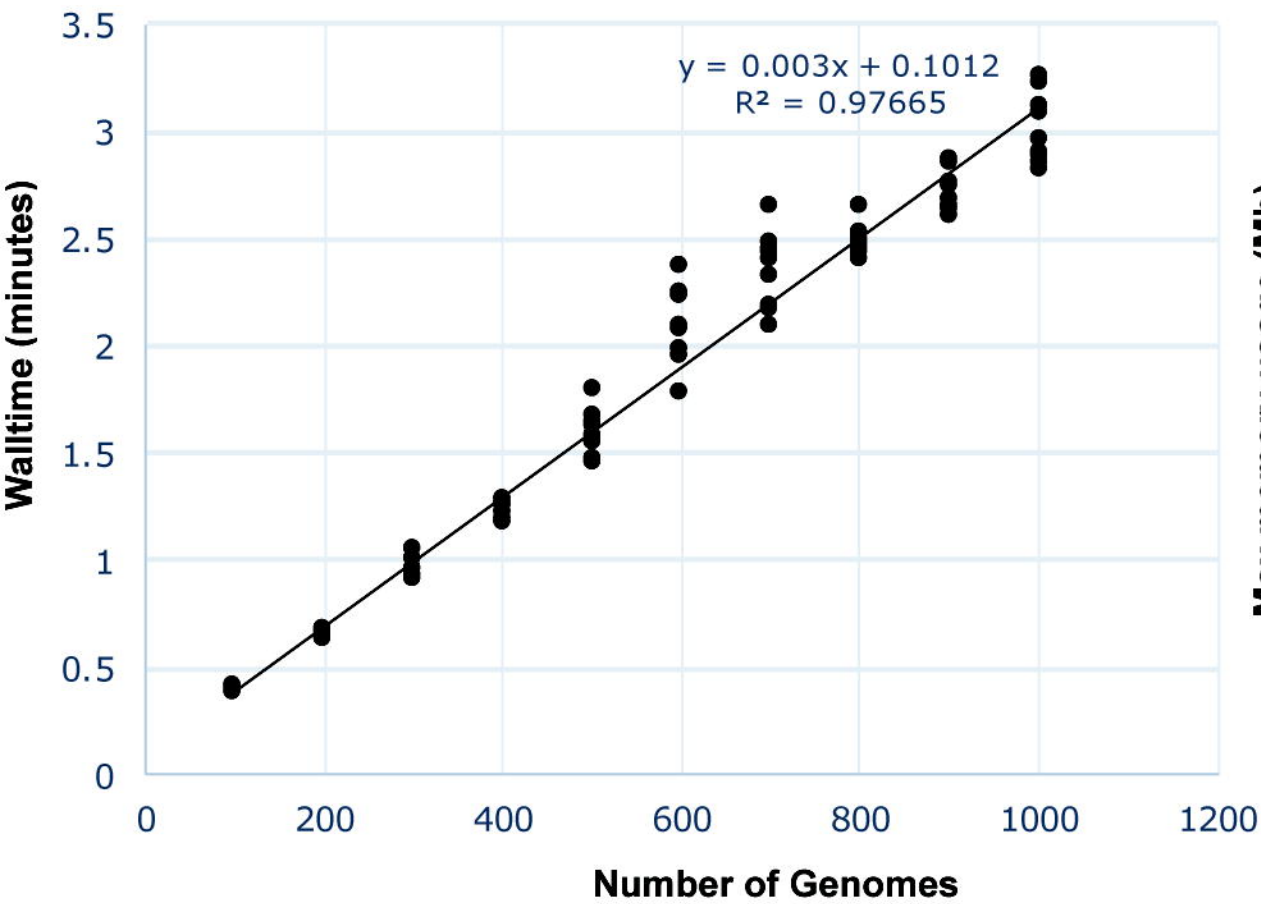**B.****RAM usage**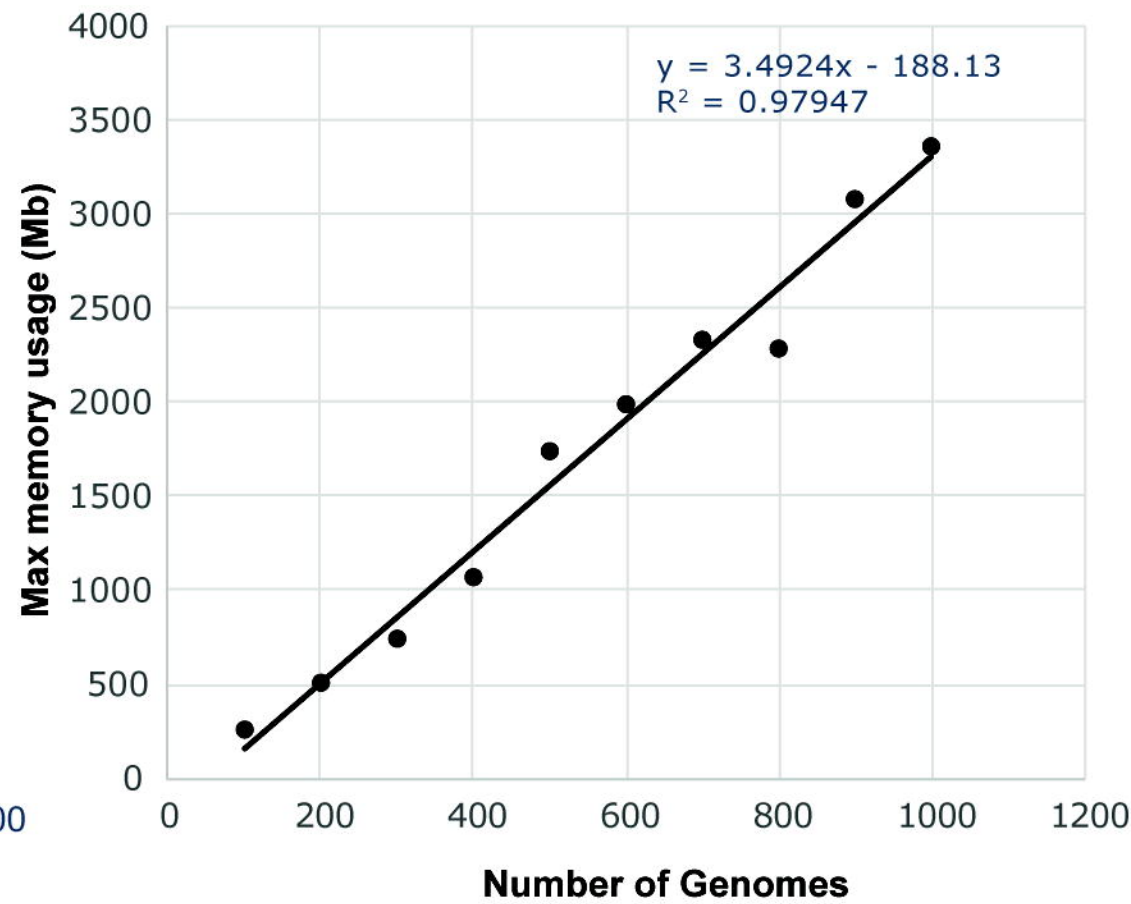

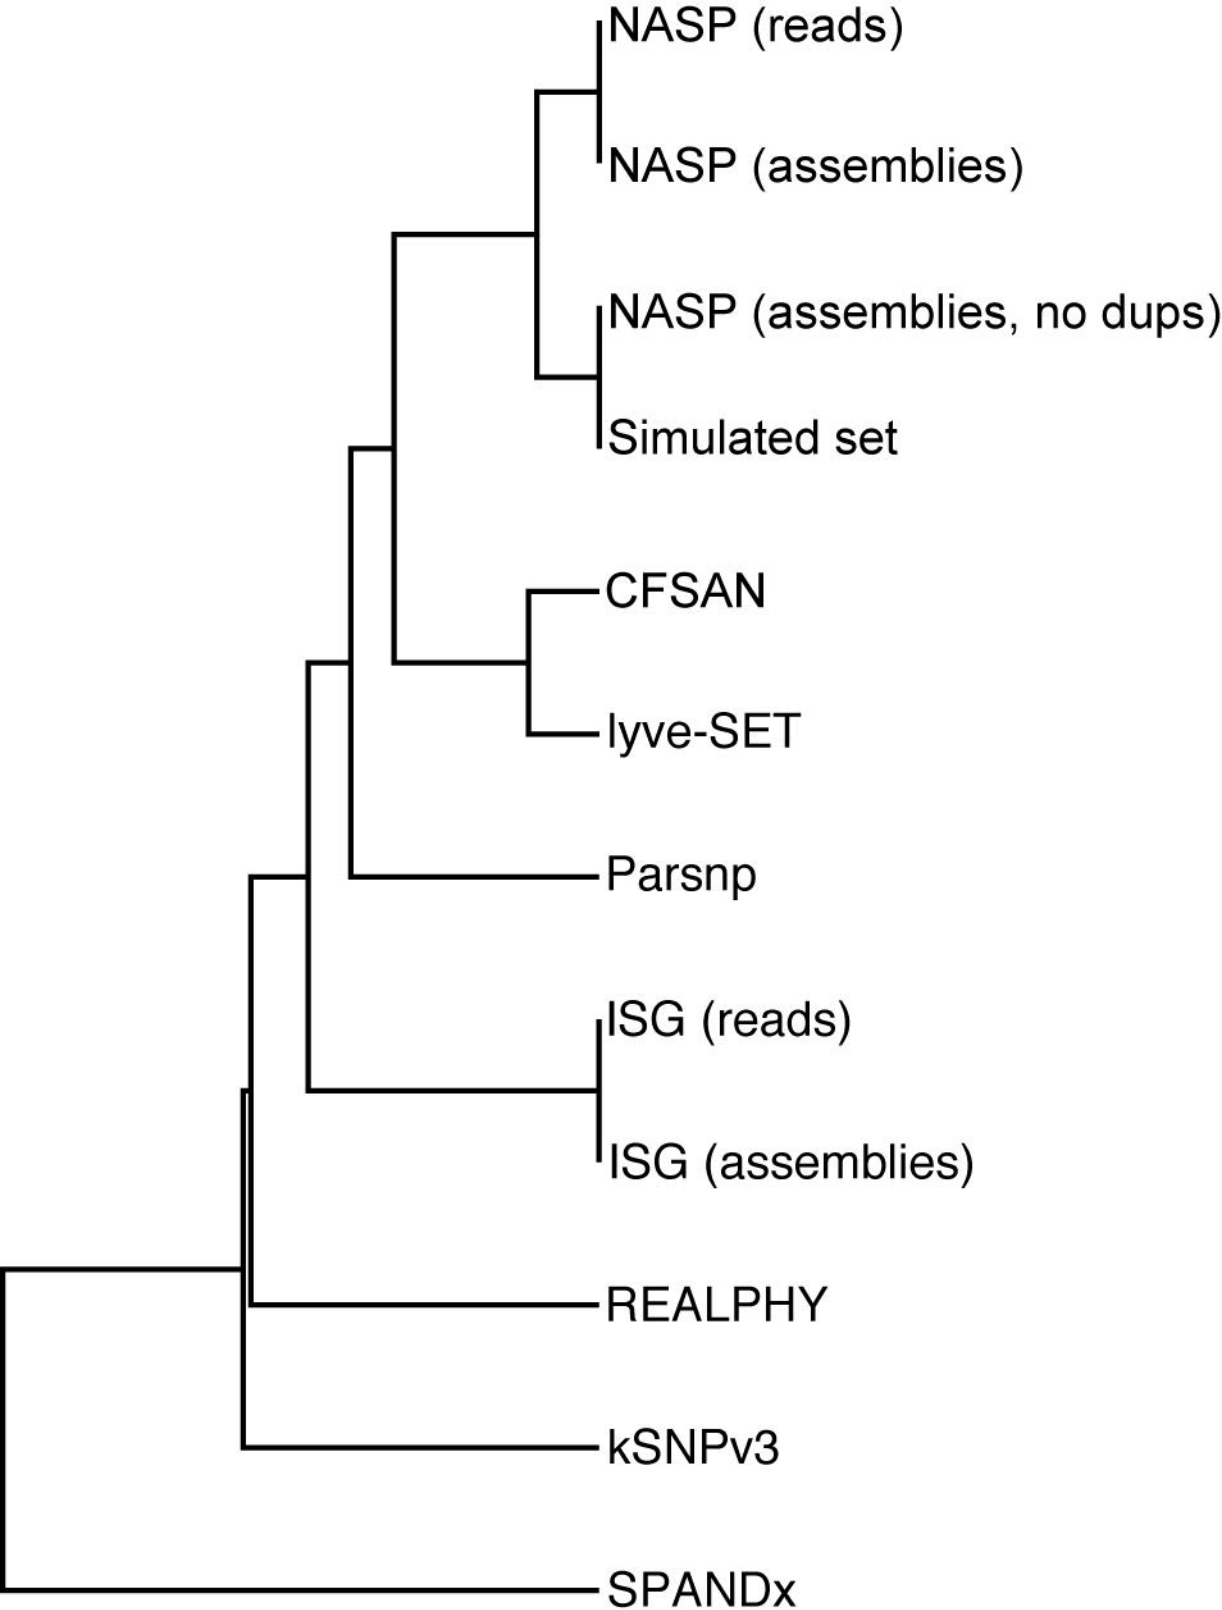



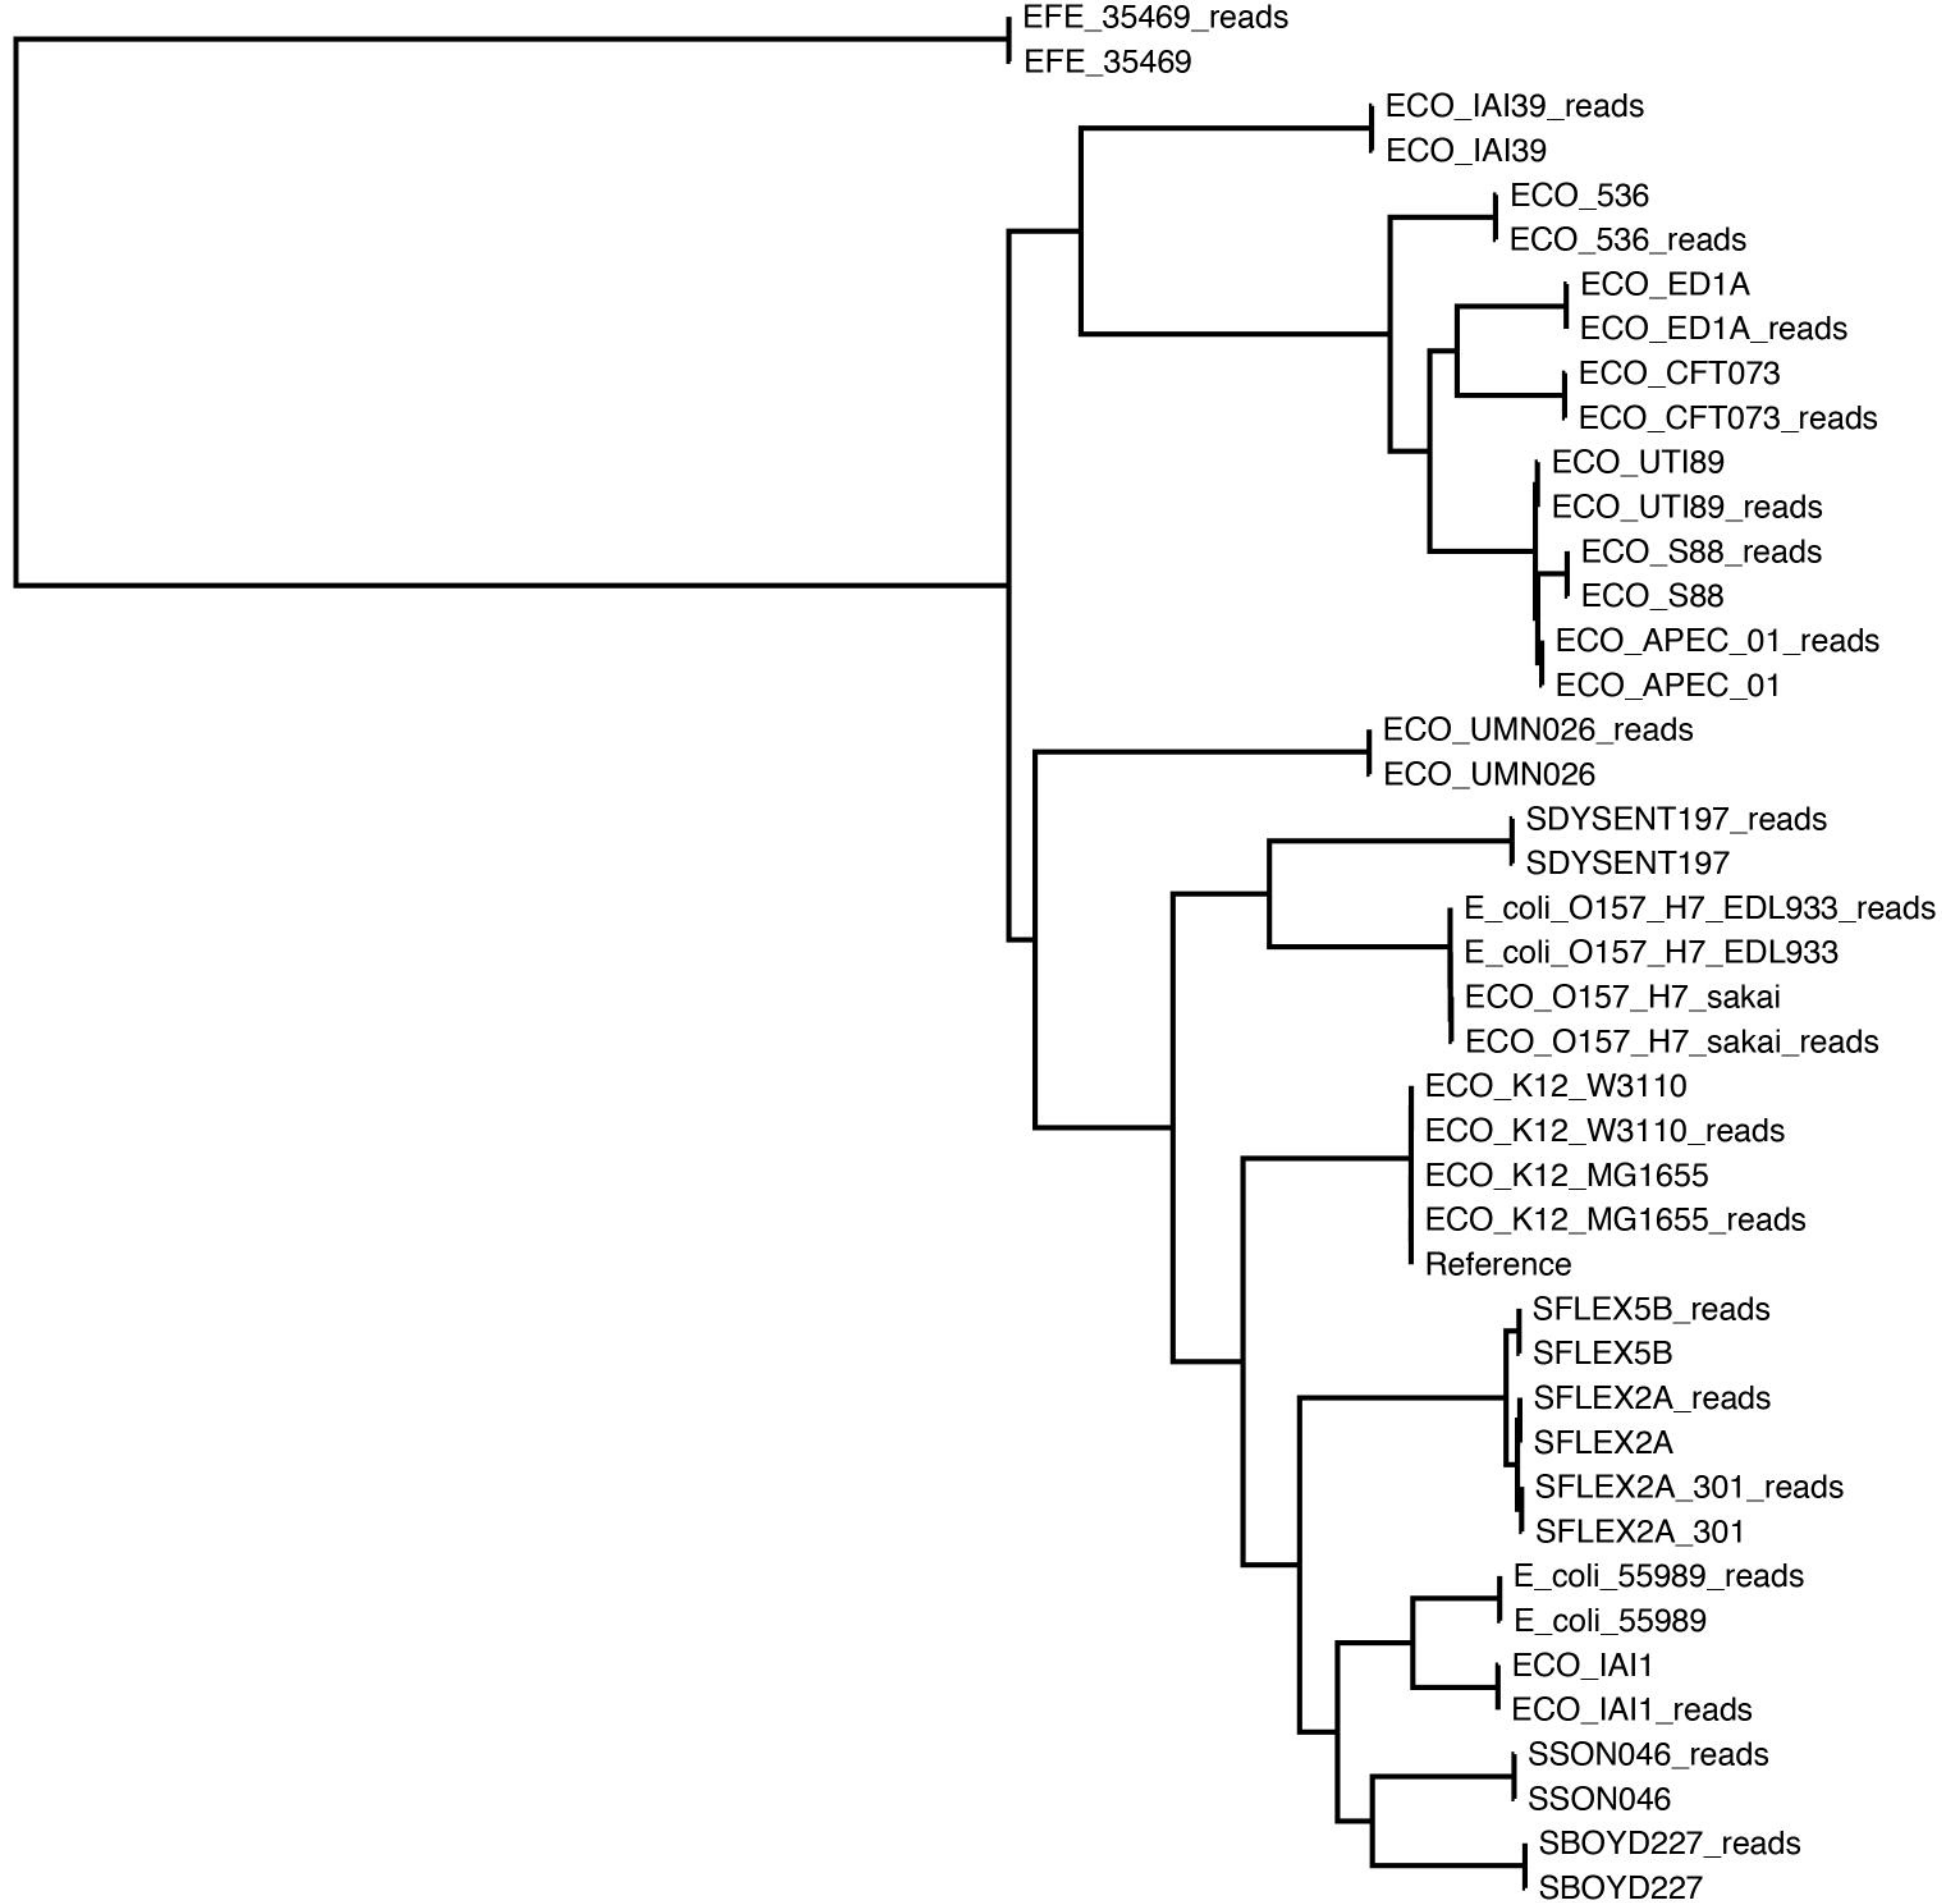

0.07

# All positions

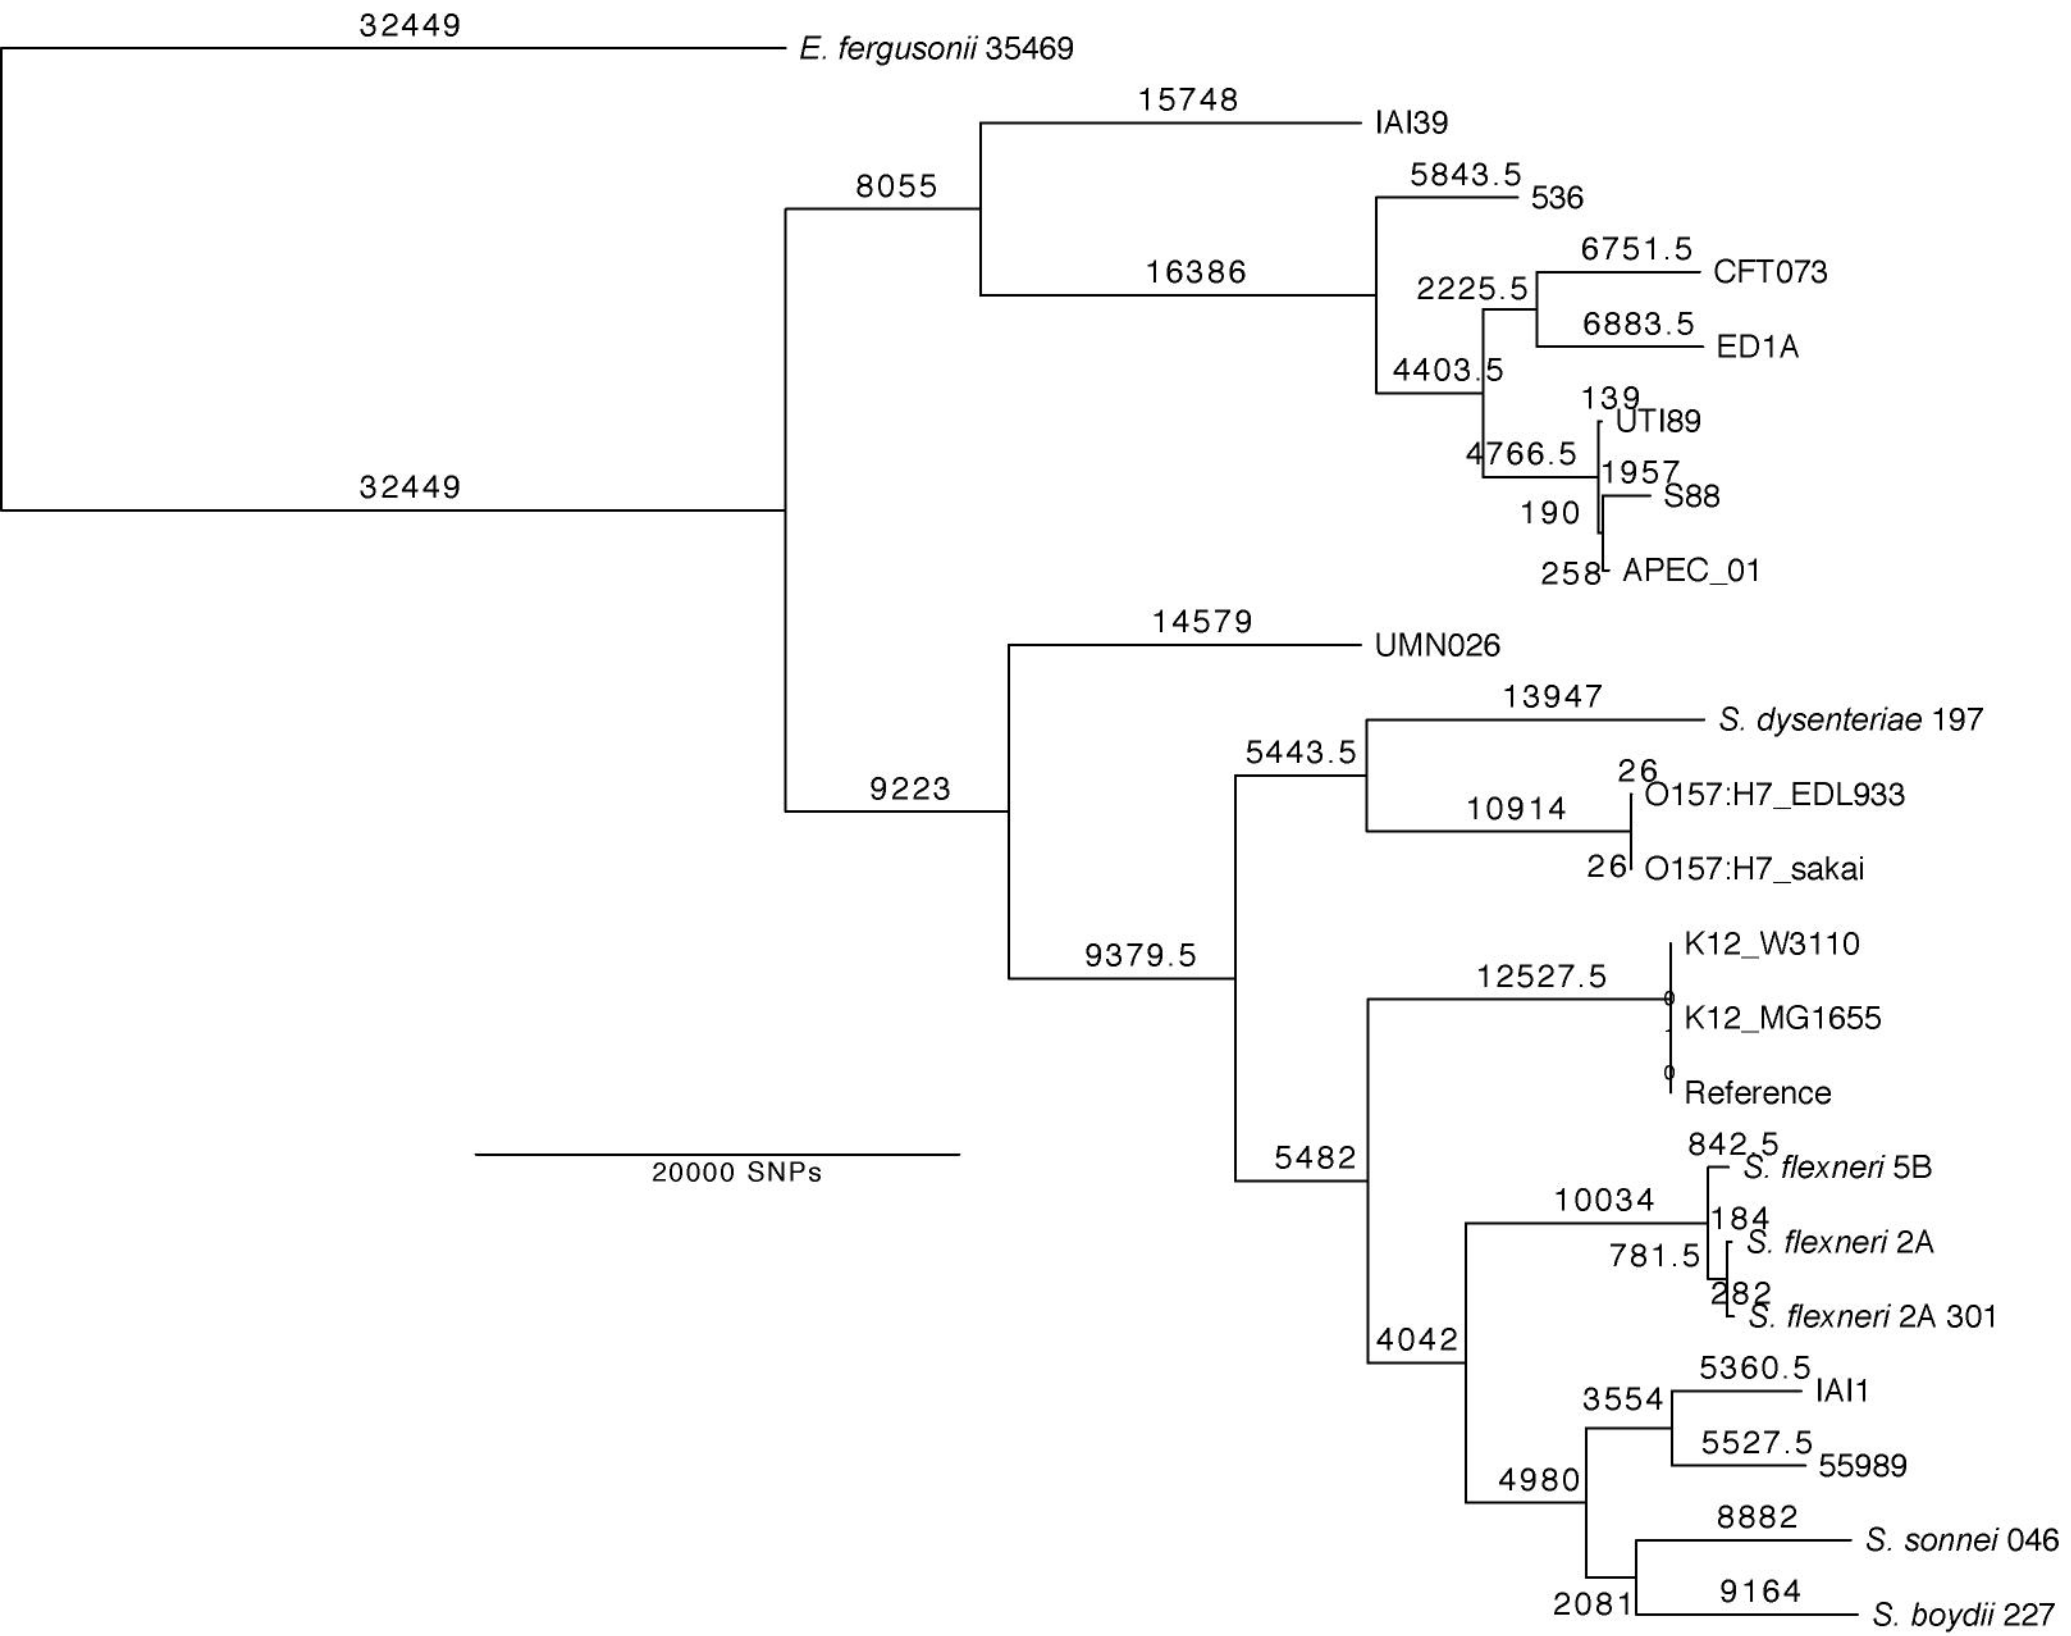

# Polymorphisms only

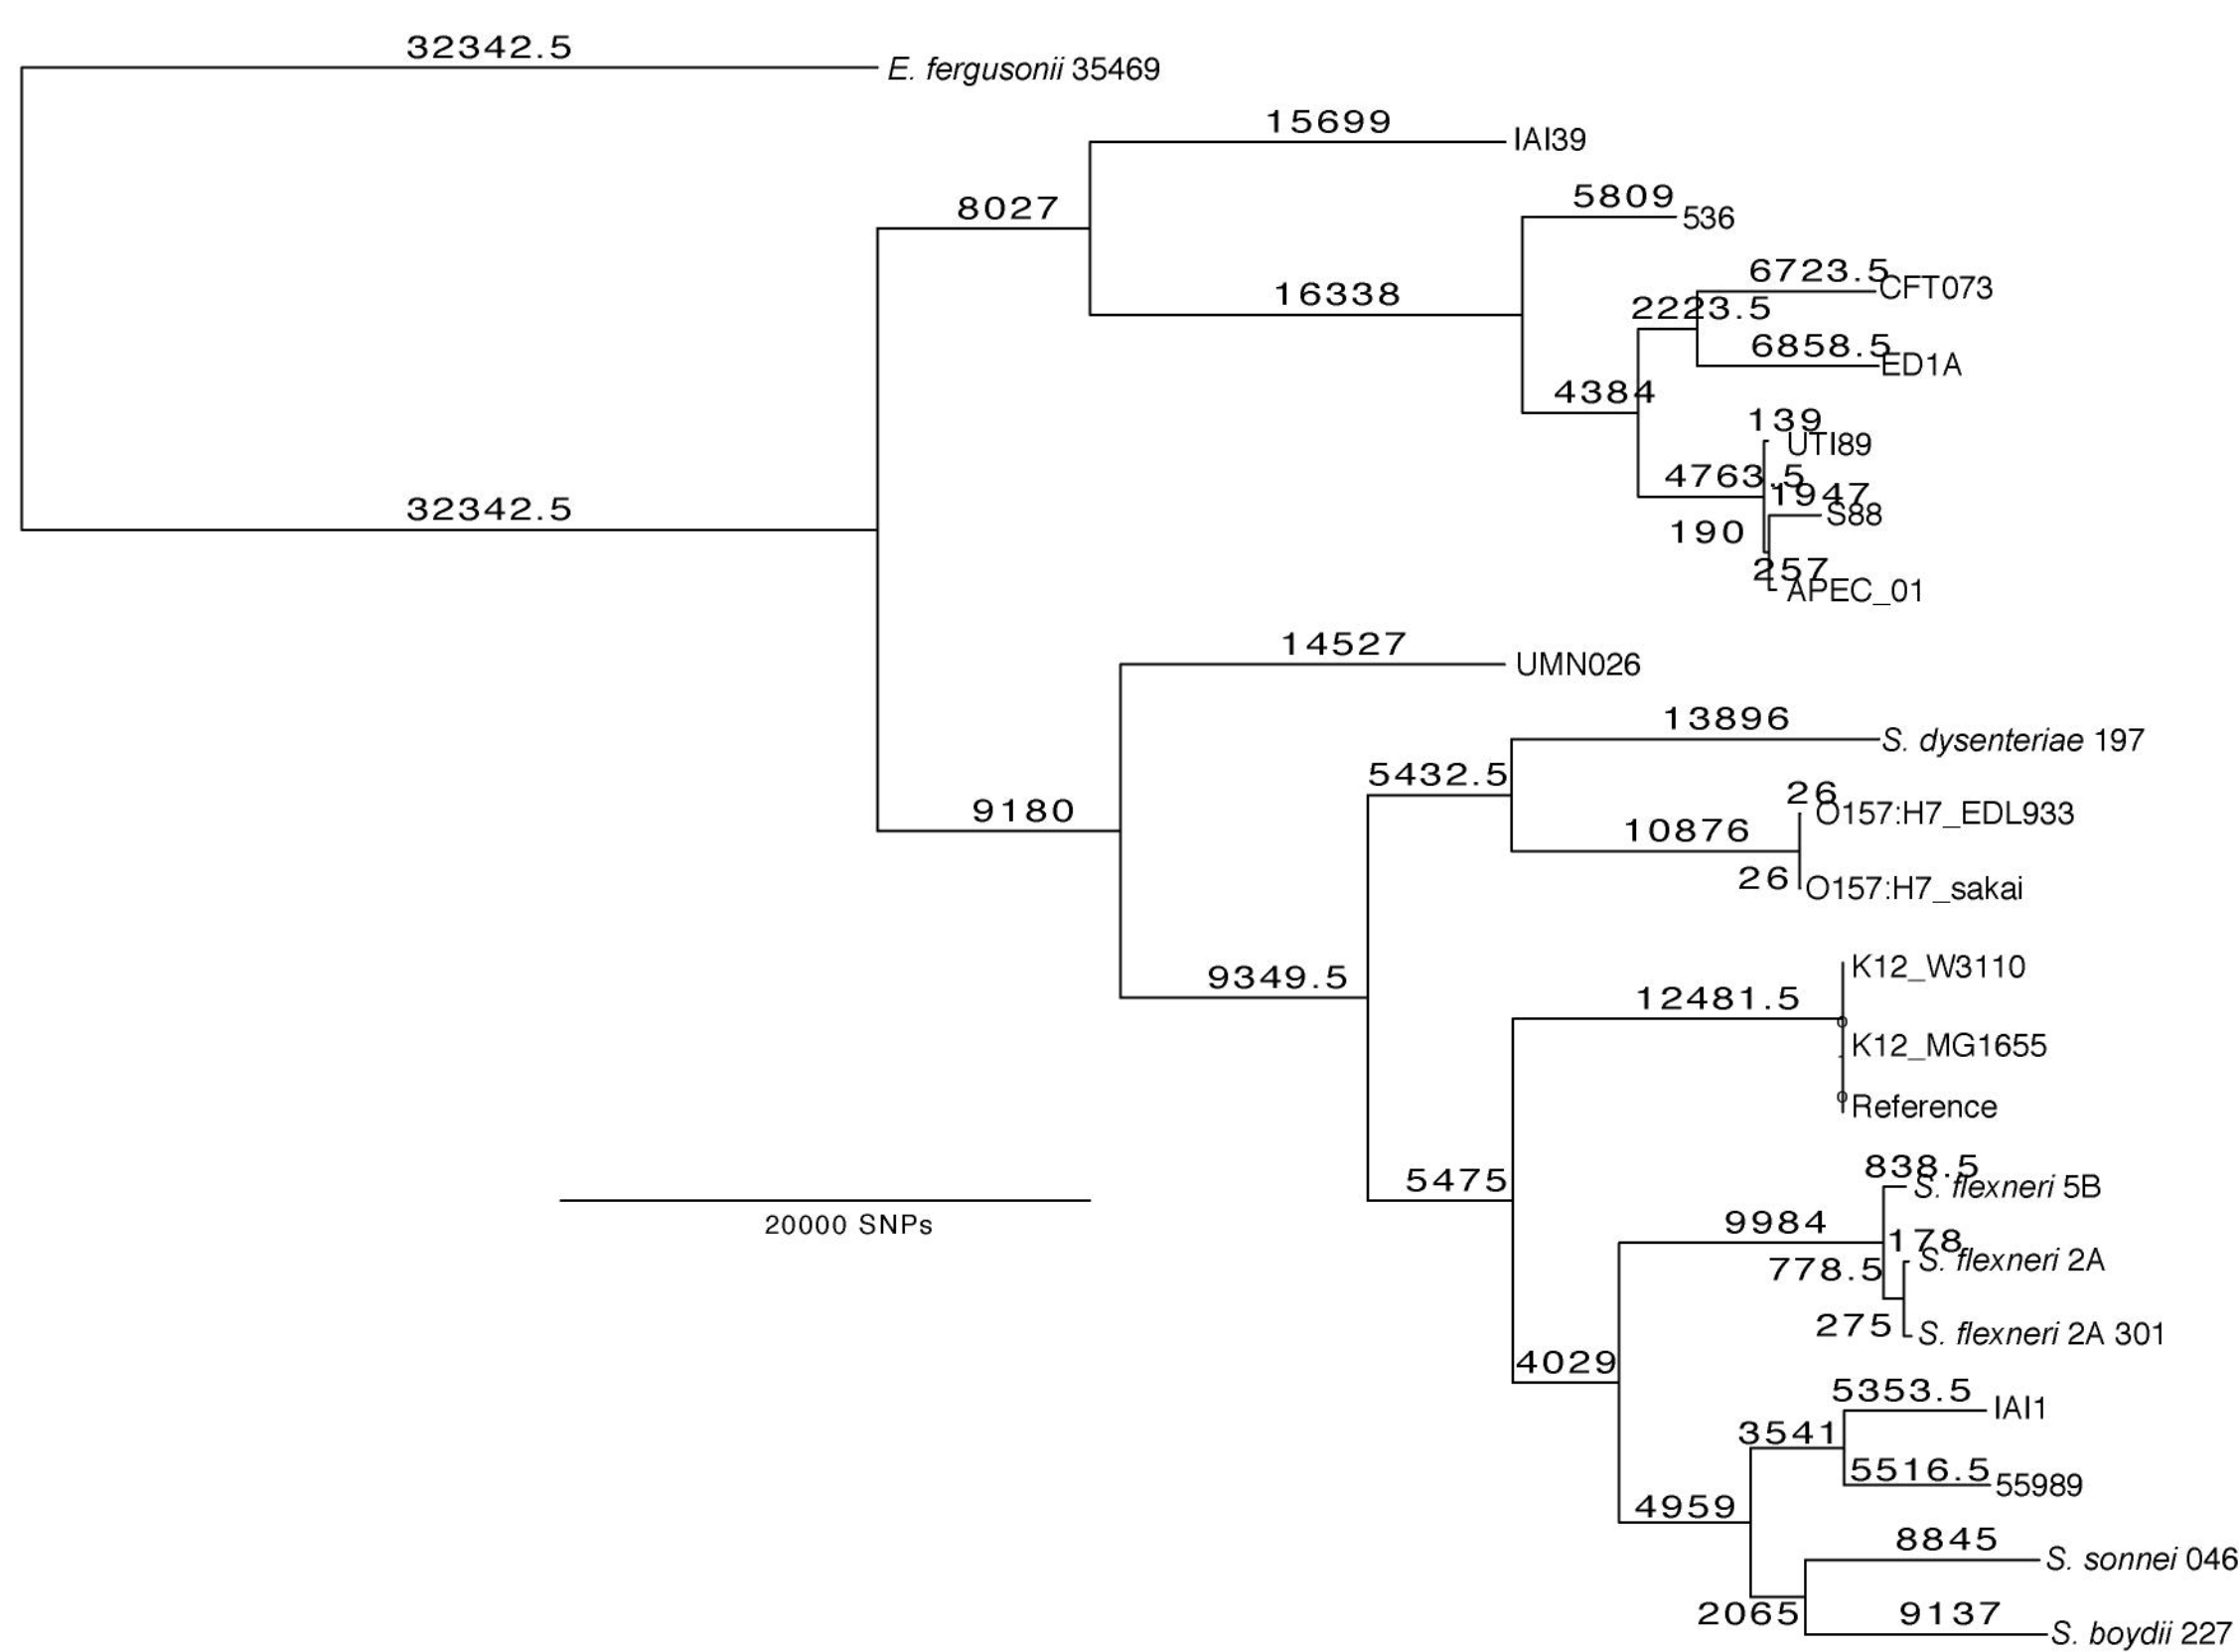

### FastTree2

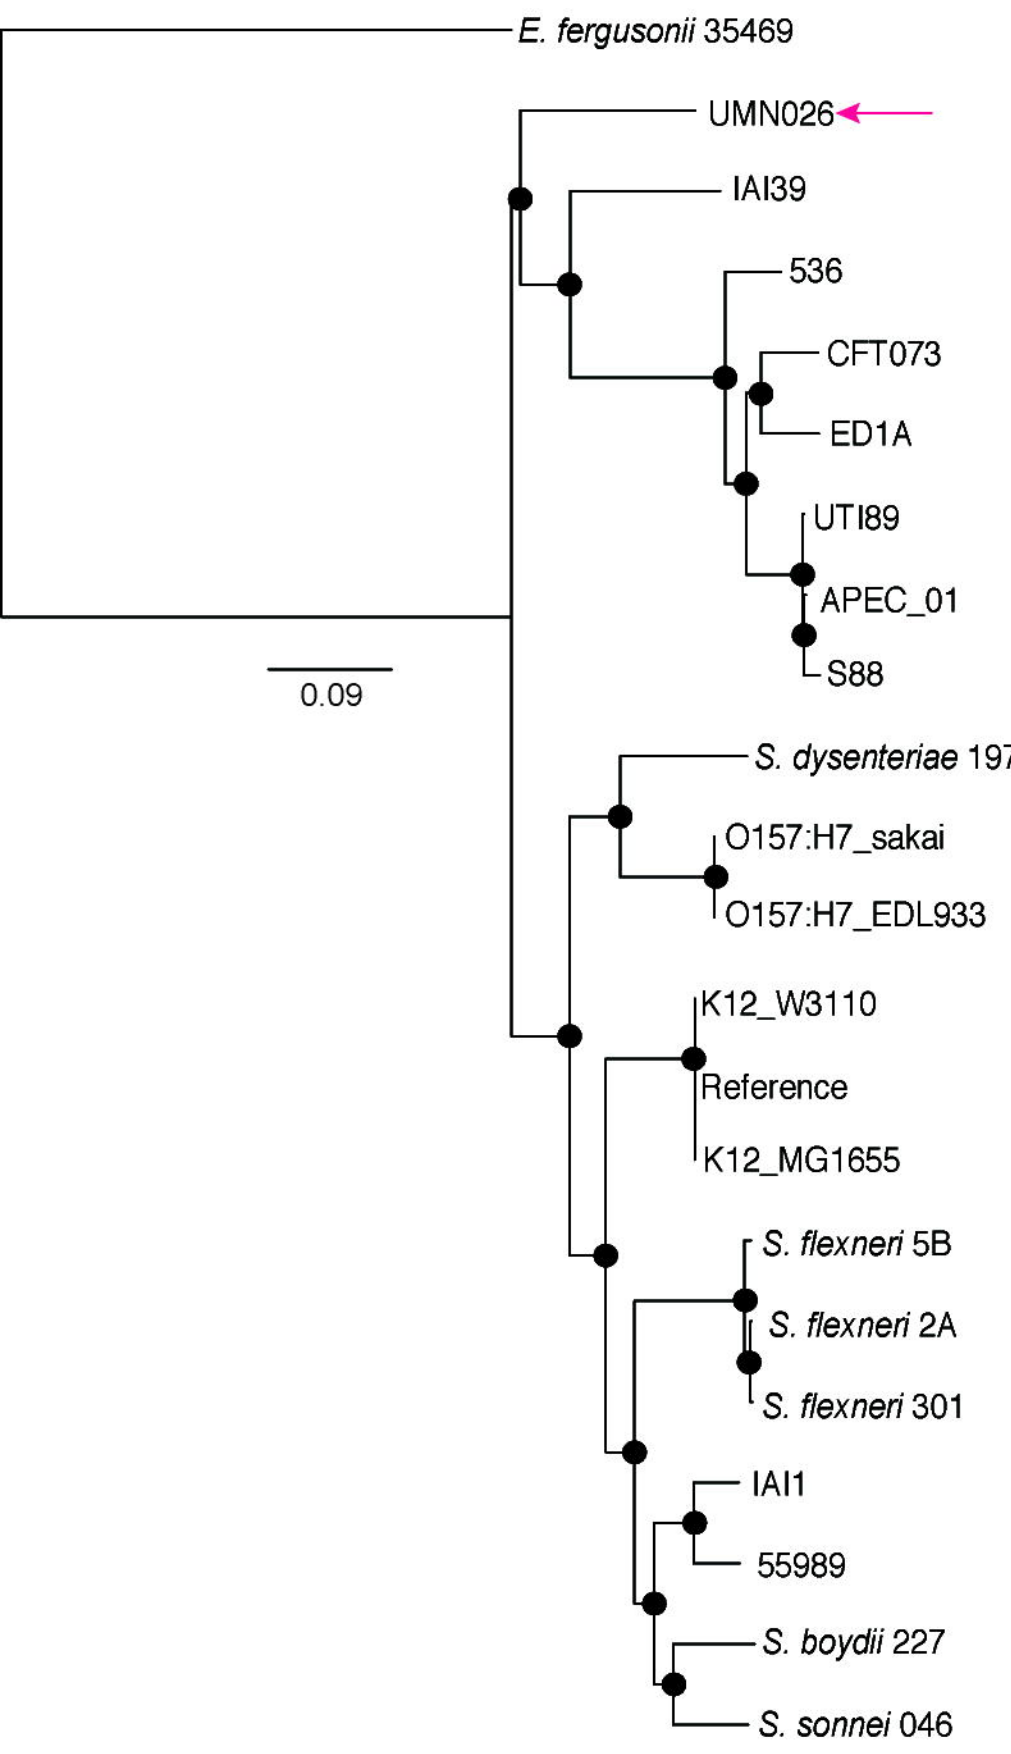

### Maximum Likelihood - RAxML

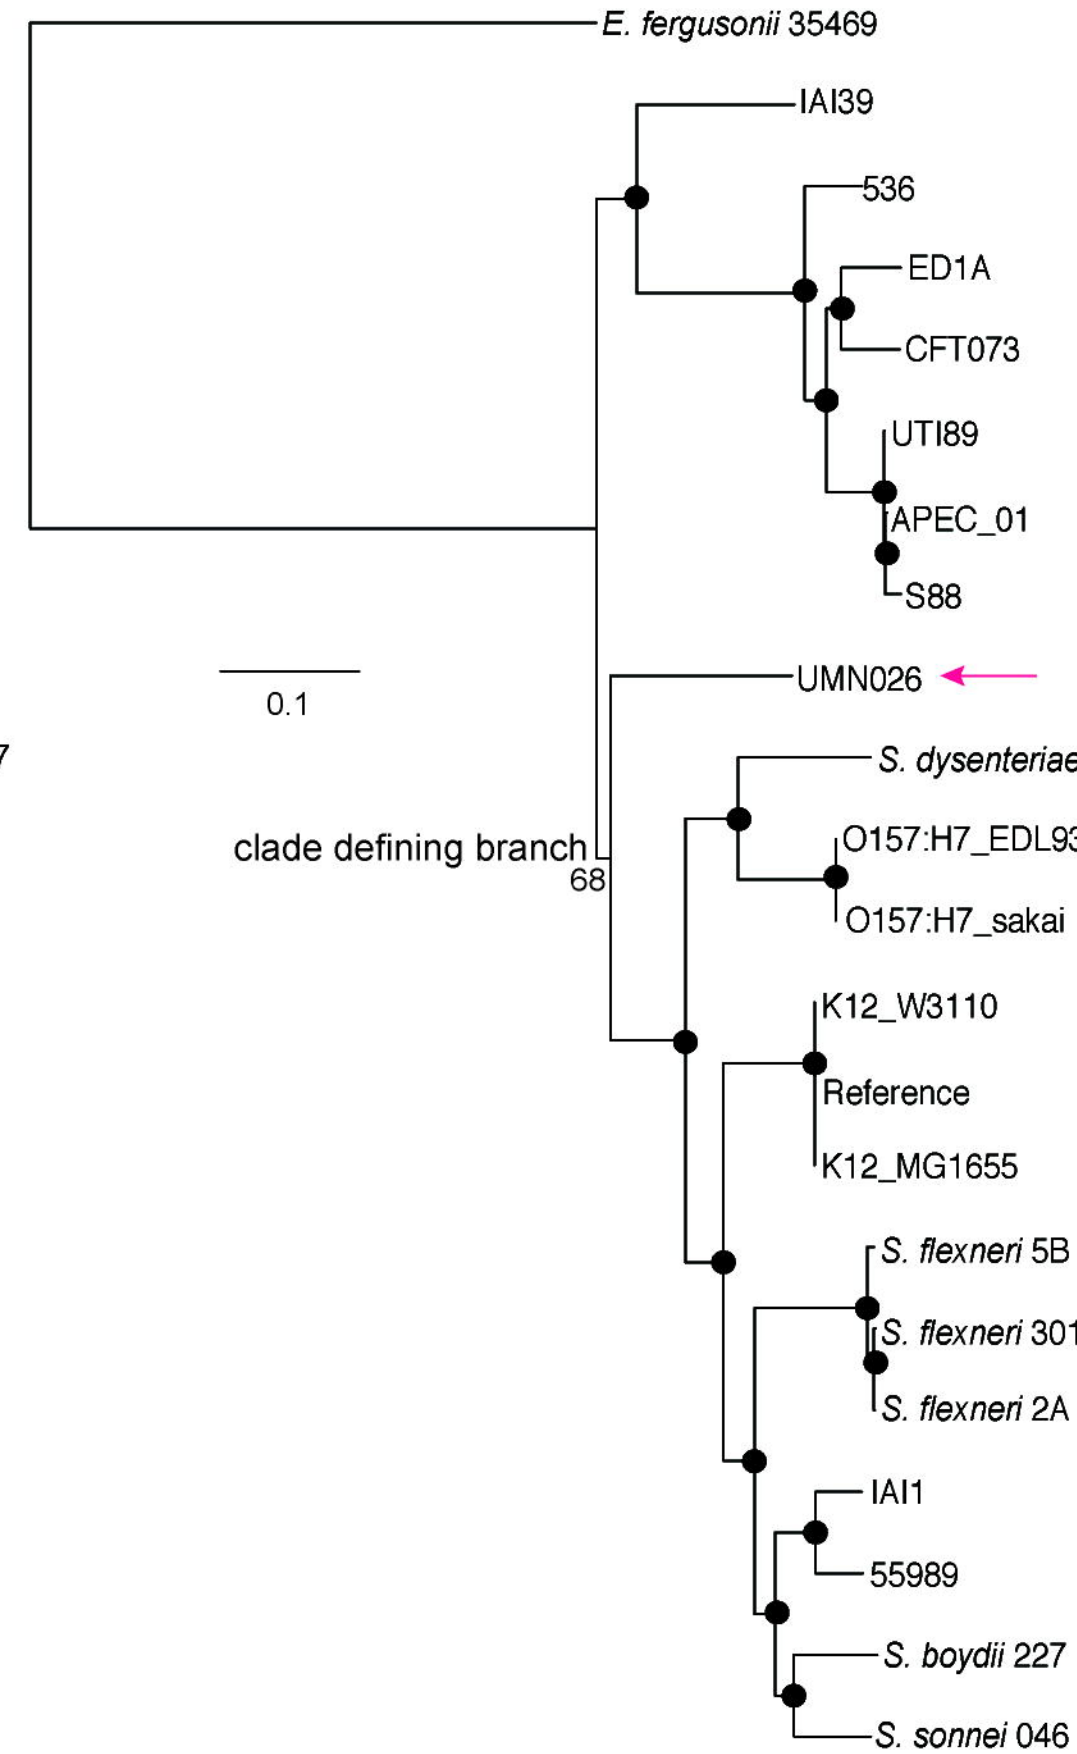

### Parsimony - Parsimonator

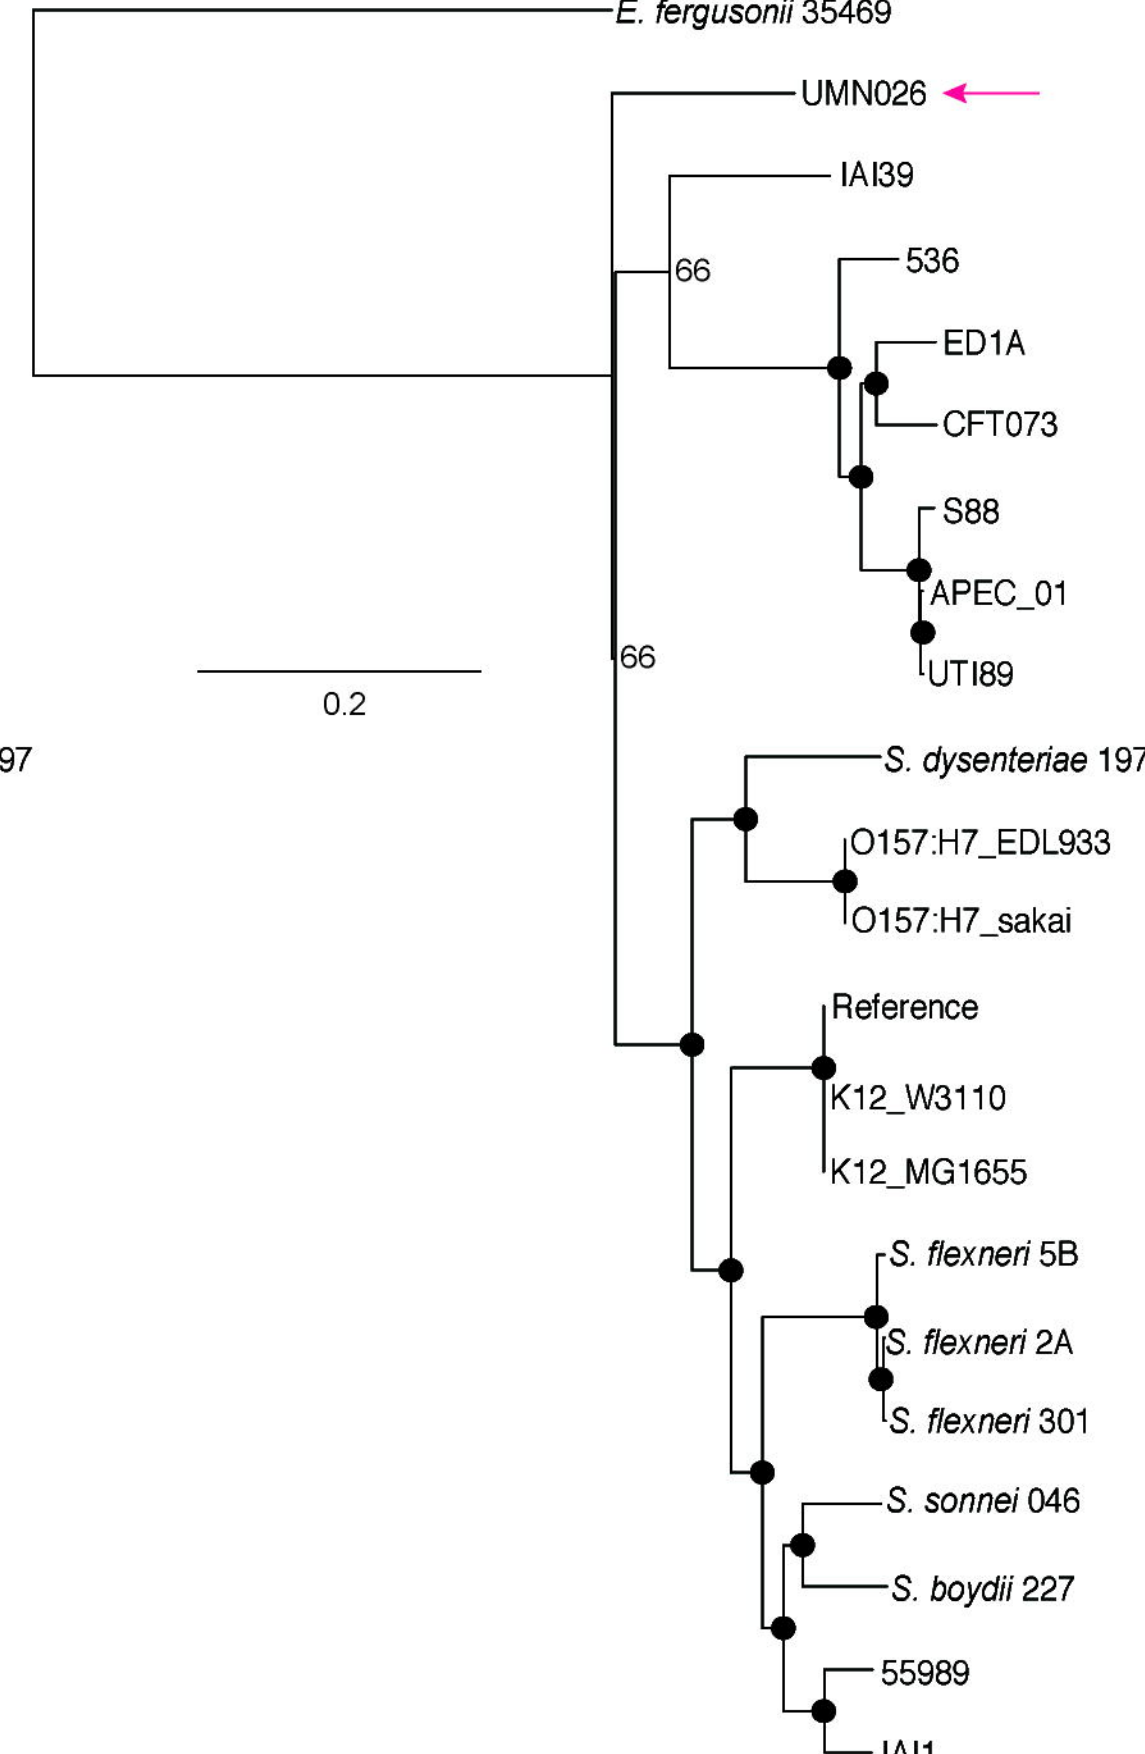

### Bayesian - Exabayes

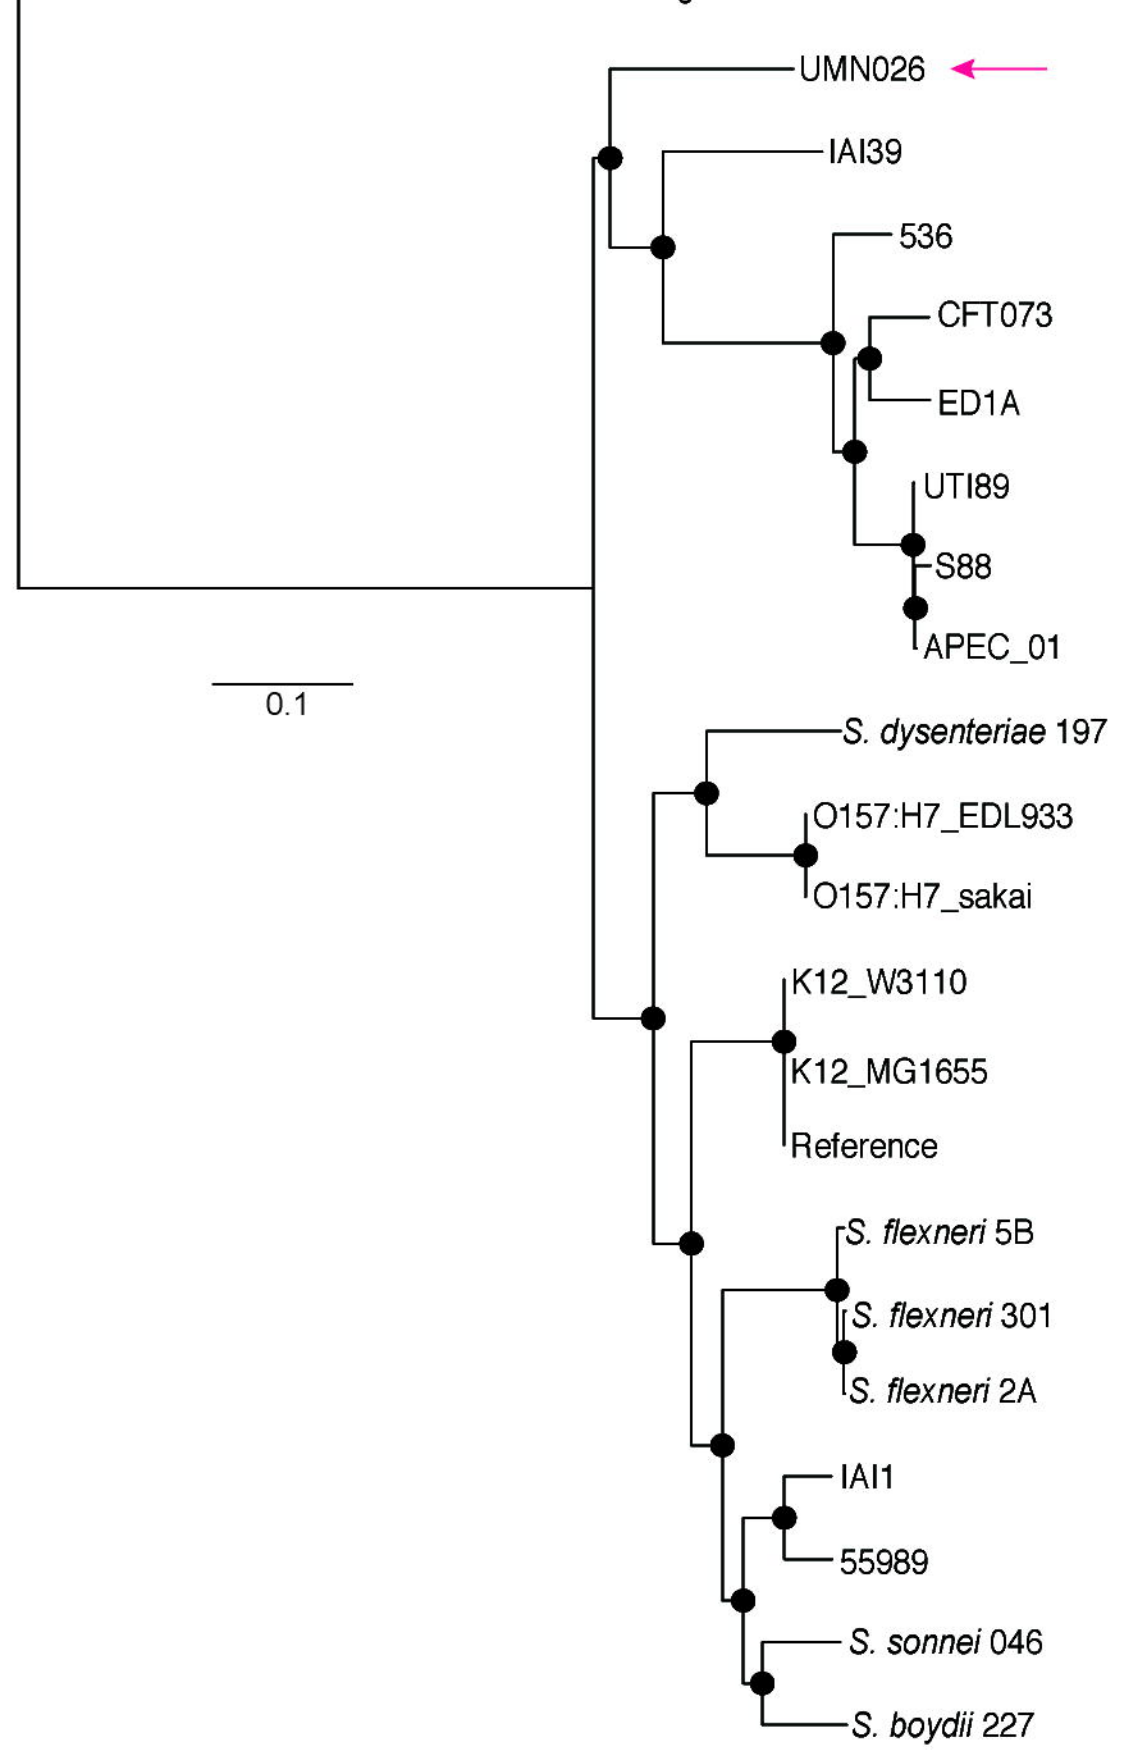

● Bootstrap or Posterior probabilities = 100
